# Supplementary material for: Evaluating a multigene environmental DNA approach for biodiversity assessment
Source: PubMed Central journal article supplement (PMC4595072; doi:10.1186/s13742-015-0086-1), 2015-10-06
Supplement: 13742_2015_86_MOESM1_ESM.pdf [file 13742_2015_86_MOESM1_ESM.pdf]

## SUPPLEMENTARY INFORMATION B

# Supplementary Information B: Evaluating a multigene environmental DNA approach for biodiversity assessment

Alexei J Drummond<sup>1,2\*</sup>, Richard D Newcomb<sup>1,3,4</sup>, Thomas R Buckley<sup>1,3,5</sup>, Dong Xie<sup>1,2</sup>, Andrew Dopheide<sup>1,3,4</sup>, Benjamin CM Potter<sup>1,3</sup>, Joseph Heled<sup>1,2</sup>, Howard A Ross<sup>1,3</sup>, Leah Tooman<sup>1,4</sup>, Stefanie Grosser<sup>1,5</sup>, Duckchul Park<sup>5</sup>, Nicholas J Demetras<sup>9</sup>, Mark I Stevens<sup>6,7</sup>, James C Russell<sup>1,3,7</sup>, Sandra H Anderson<sup>3</sup>, Anna Carter<sup>1,10</sup> and Nicola Nelson<sup>1,10</sup>

\* Correspondence:

[alexei@cs.auckland.ac.nz](mailto:alexei@cs.auckland.ac.nz)

<sup>1</sup>Allan Wilson Centre, University of Auckland, Auckland, New Zealand  
Full list of author information is available at the end of the article

### Result of removing all singleton OTUs from the eDNA datasets

The figures and tables below are the result of removing all of the singleton OTUs from the eDNA datasets.

#### Author details

<sup>1</sup>Allan Wilson Centre, University of Auckland, Auckland, New Zealand. <sup>2</sup>Department of Computer Science, University of Auckland, Private Bag 92019, Auckland 1142, New Zealand. <sup>3</sup>School of Biological Sciences, University of Auckland, Private Bag 92019, Auckland 1142, New Zealand. <sup>4</sup>The Institute for Plant and Food Research, Private Bag 92169, Auckland 1142, New Zealand. <sup>5</sup>Landcare Research, Private Bag 92170, Auckland 1142, New Zealand. <sup>6</sup>South Australian Museum, North Terrace, Adelaide SA 5000, Australia. <sup>7</sup>School of Pharmacy and Medical Sciences, University of South Australia, GPO Box 2471, Adelaide SA 5001, Australia. <sup>8</sup>Department of Statistics, University of Auckland, Private Bag 92019, Auckland 1142, New Zealand. <sup>9</sup>Department of Biological Sciences, University of Waikato, Private Bag 3105, Hamilton 3240, New Zealand. <sup>10</sup>School of Biological Sciences, Victoria University of Wellington, PO Box 600, Wellington 6140, New Zealand.

#### References

**Figure SB1** The number of OTUs at the 97% clustering threshold across the number of sites.

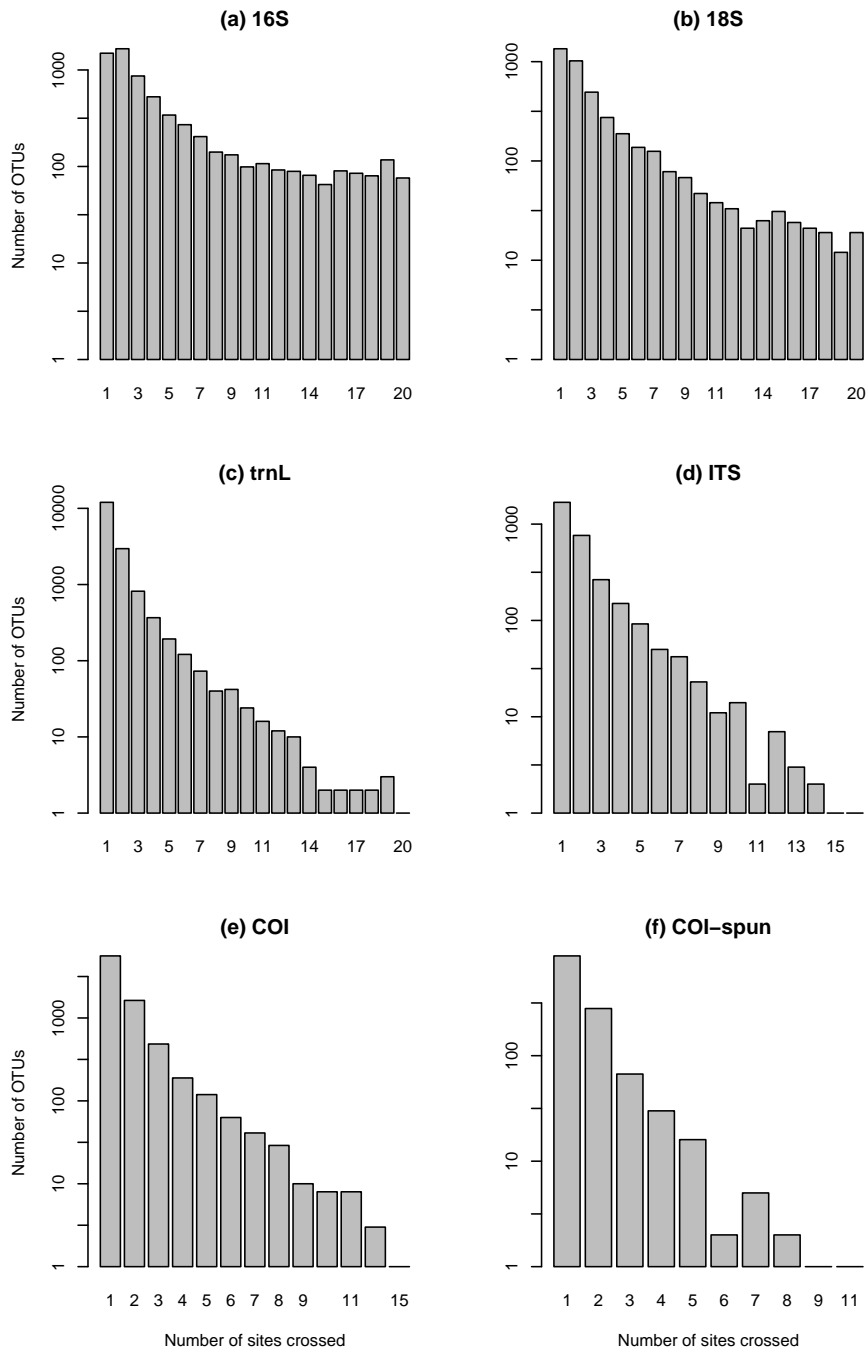



**Figure SB3** Plots of diversities using cutoff thresholds ranging from 90-100% for OTU classification of: (a)  $\alpha$  diversity, (b) effective  $\alpha$  diversity, (c)  $\beta$  diversity, (d) effective  $\beta$  diversity, (e)  $\gamma$  diversity, and (f) effective  $\gamma$  diversity. Molecular datasets include 16S, 18S, *trnL*, ITS, COI, and COI-spun.

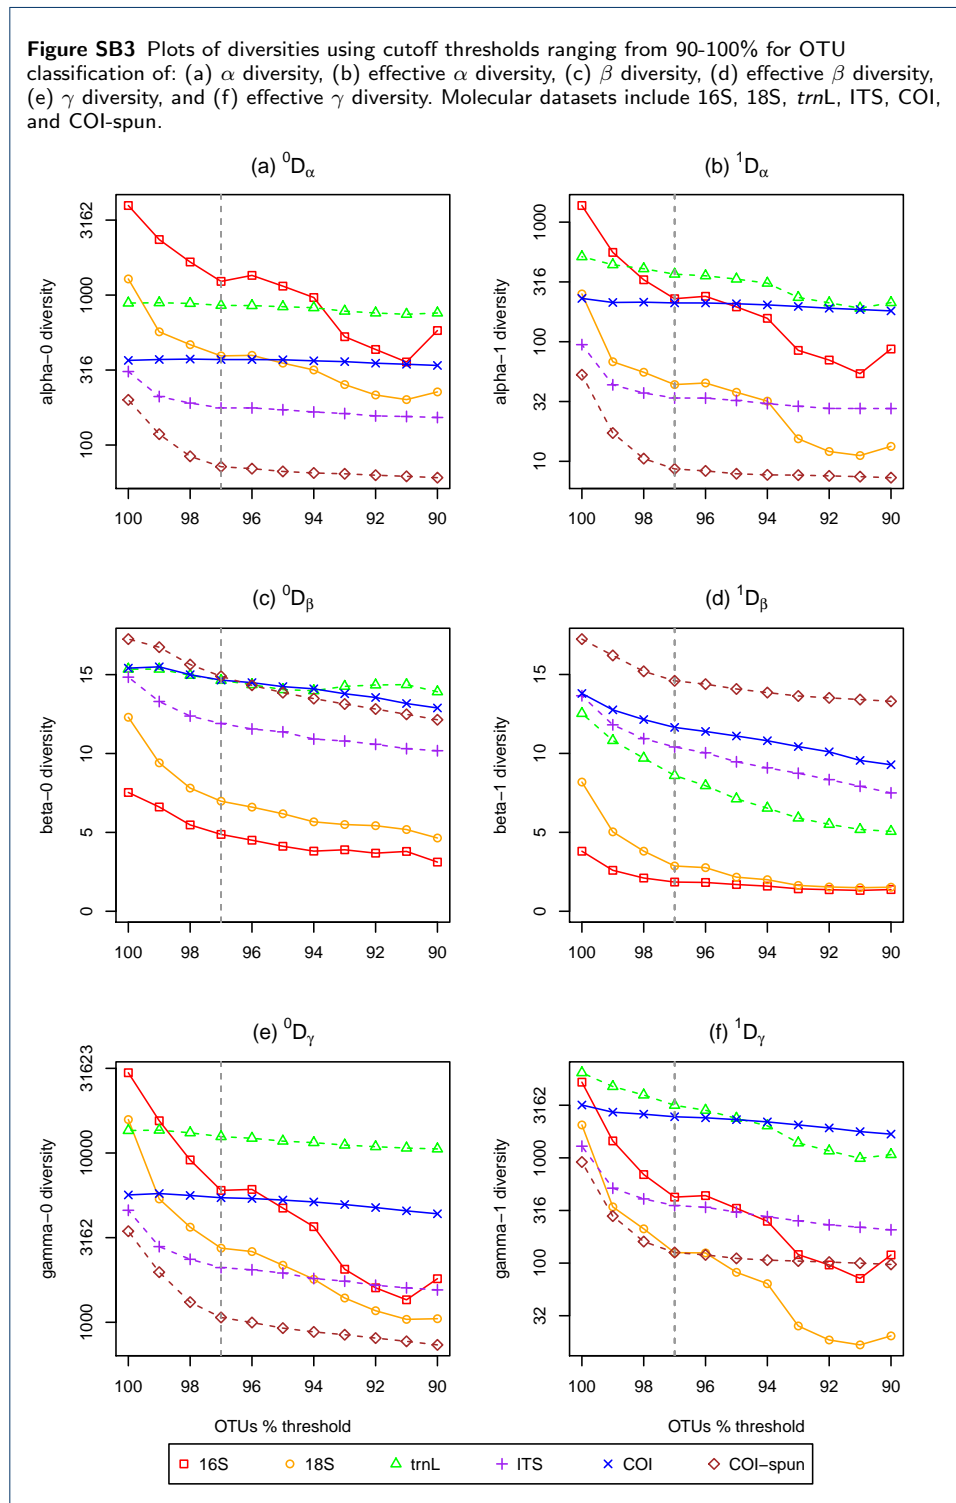

**Figure SB4** Rarefaction curves for diversities estimated using a 97% threshold for OTU classification of: (a)  $\alpha$  diversity, (b) effective  $\alpha$  diversity, (c)  $\beta$  diversity, (d) effective  $\beta$  diversity, (e)  $\gamma$  diversity, and (f) effective  $\gamma$  diversity. Molecular datasets include 16S, 18S, *trnL*, ITS, COI, and COI-spun.

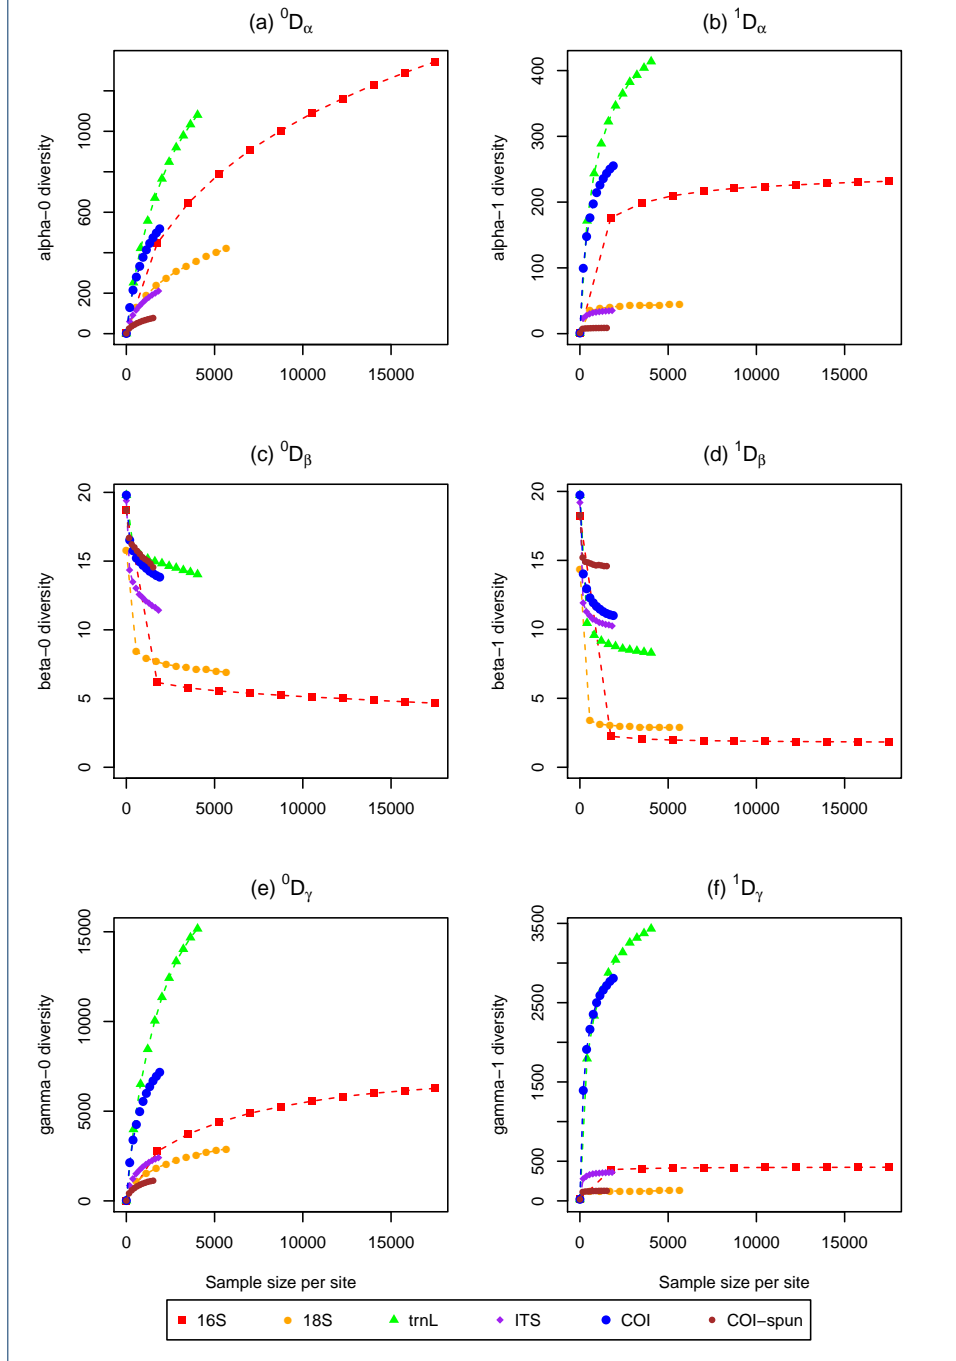

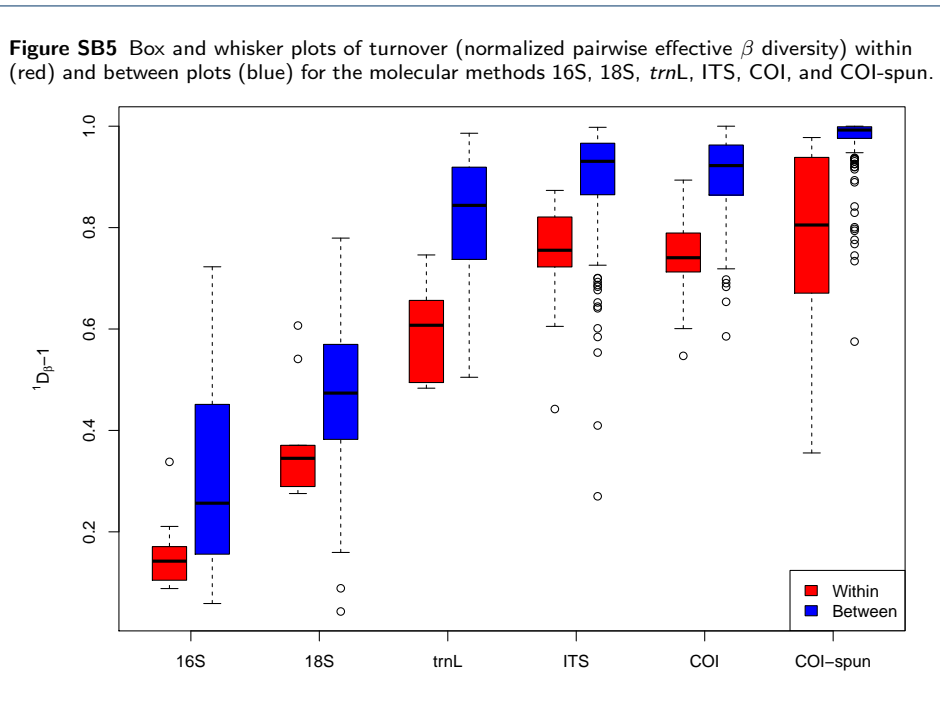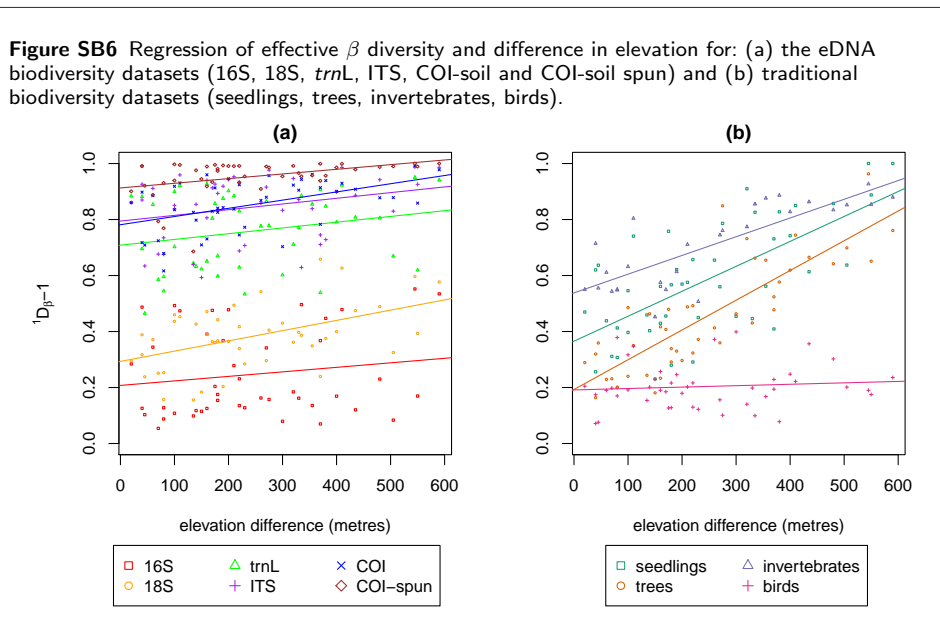

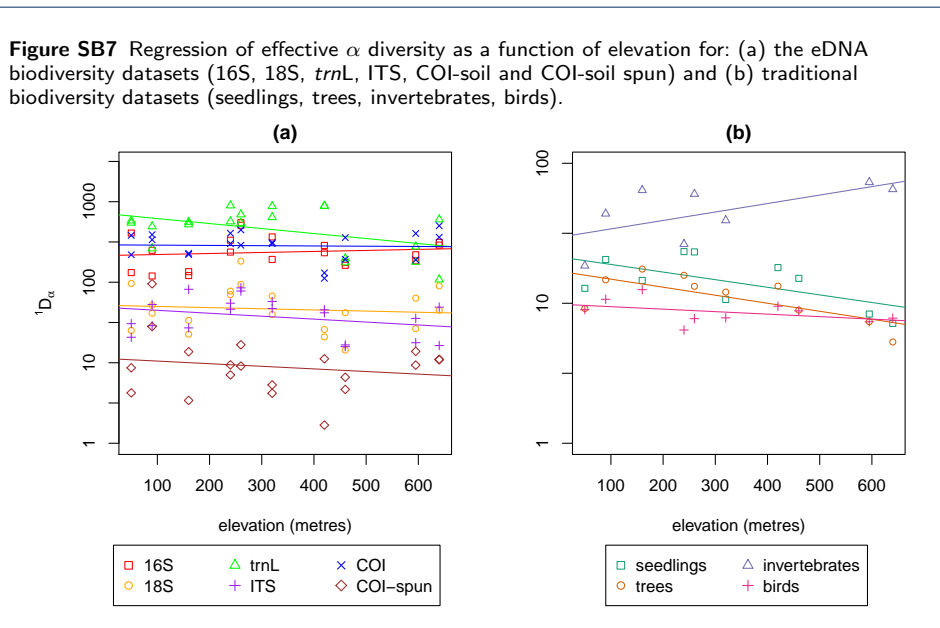

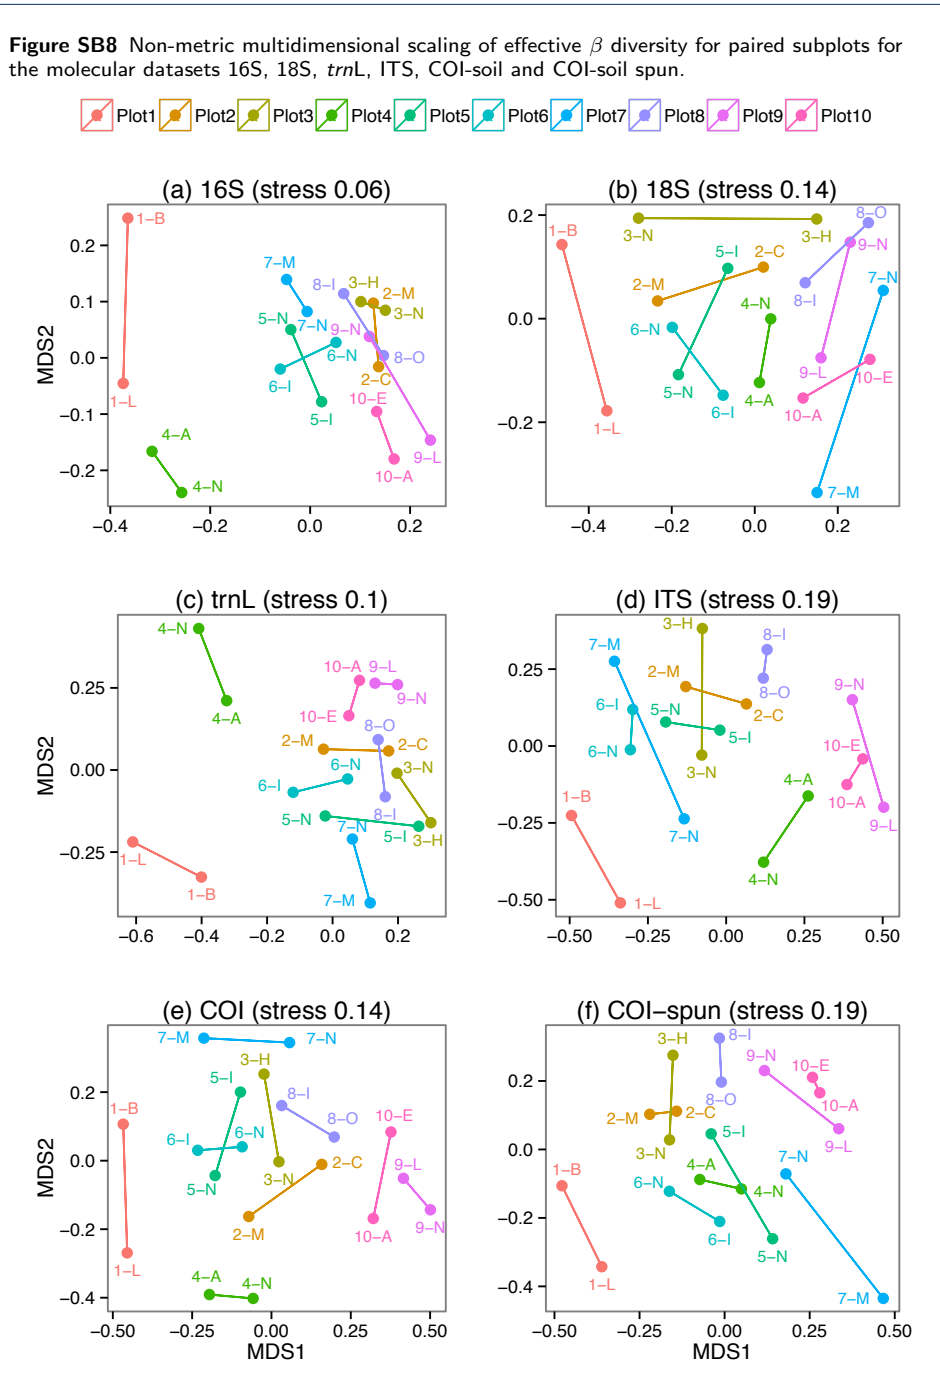



**Figure SB9** Procrustes analysis of effective  $\beta$  diversity between the eDNA datasets and traditional datasets, their significance level in parentheses is estimated based on 4,999 permutations.

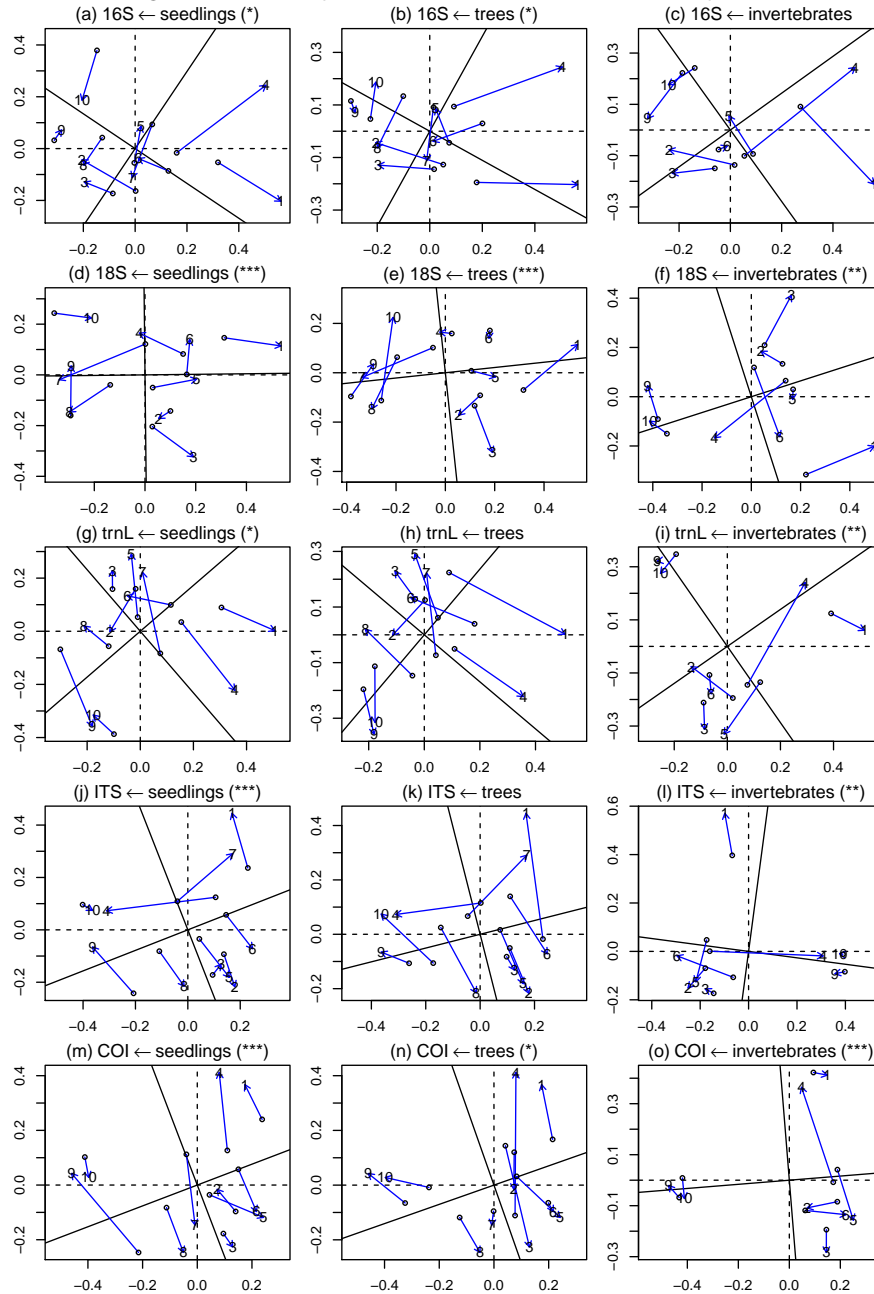

**Figure SB10** Multidimensional scaling (no birds) of pairwise community matrix correlations of effective  $\beta$  diversity within and between the eDNA datasets (16S, 18S, trnL, ITS, COI-soil and COI-soil spun) and traditional datasets (seedlings, trees, invertebrates).

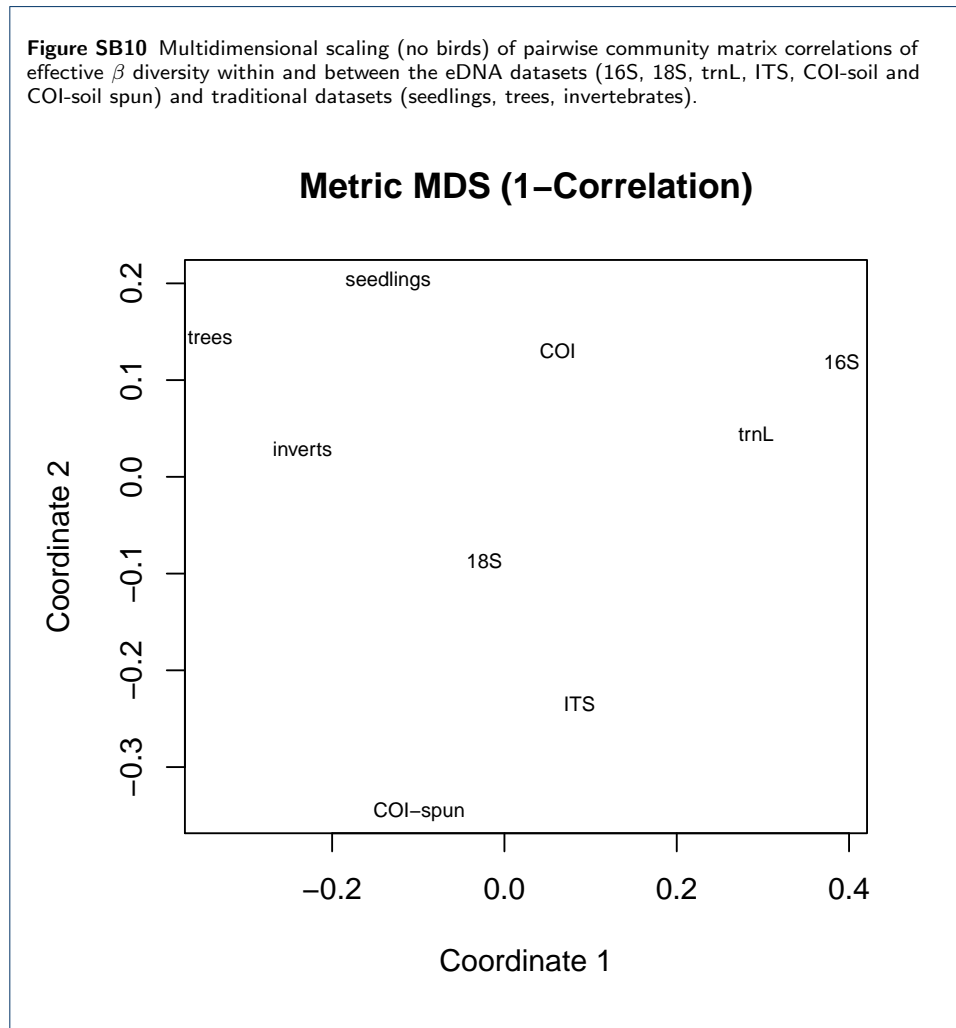

**Figure SB11** The probability of having a) maximum  $\gamma$  diversity and b) maximum effective  $\beta$  diversity of all possible combinations of the four plots for the eDNA biodiversity datasets (16S, 18S, *trnL*, ITS, COI-soil and COI-soil spun) and the traditional biodiversity datasets (seedlings, trees, invertebrates, birds).

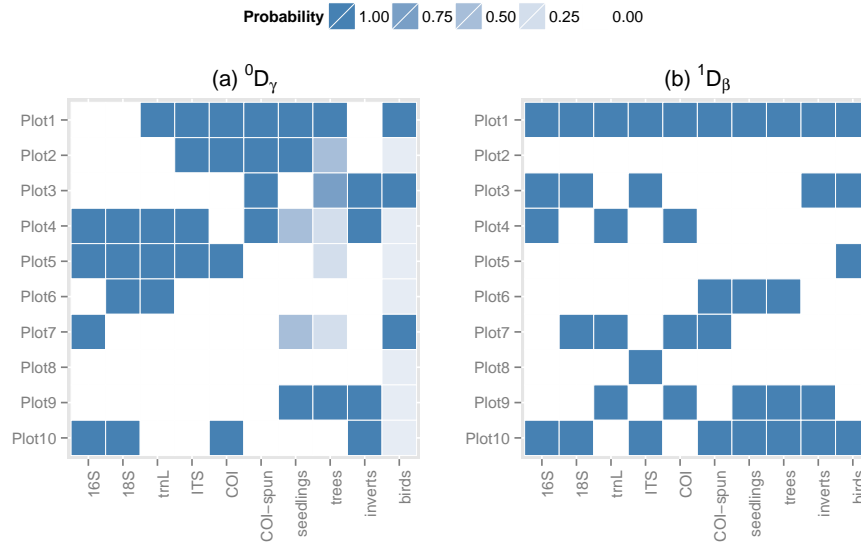

**Figure SB12** Maximum remained  $\gamma$  diversity as a function of number of sites for (a) eDNA biodiversity datasets (16S, 18S, *trnL*, ITS, COI-soil and COI-soil spun) and (b) traditional biodiversity datasets (seedlings, trees, invertebrates, birds). Plots were removed sequentially so as to minimize the loss of overall  $\gamma$  diversity among the remaining plots. This procedure was undertaken independently for each of the ten biodiversity measures.

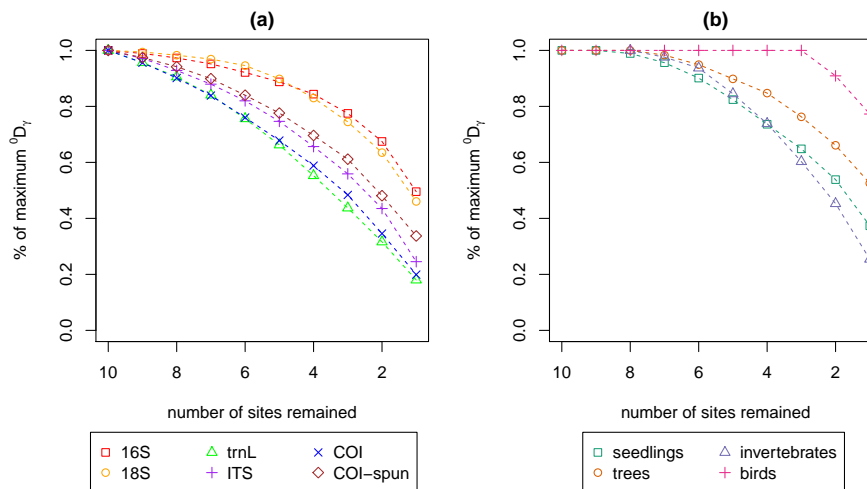

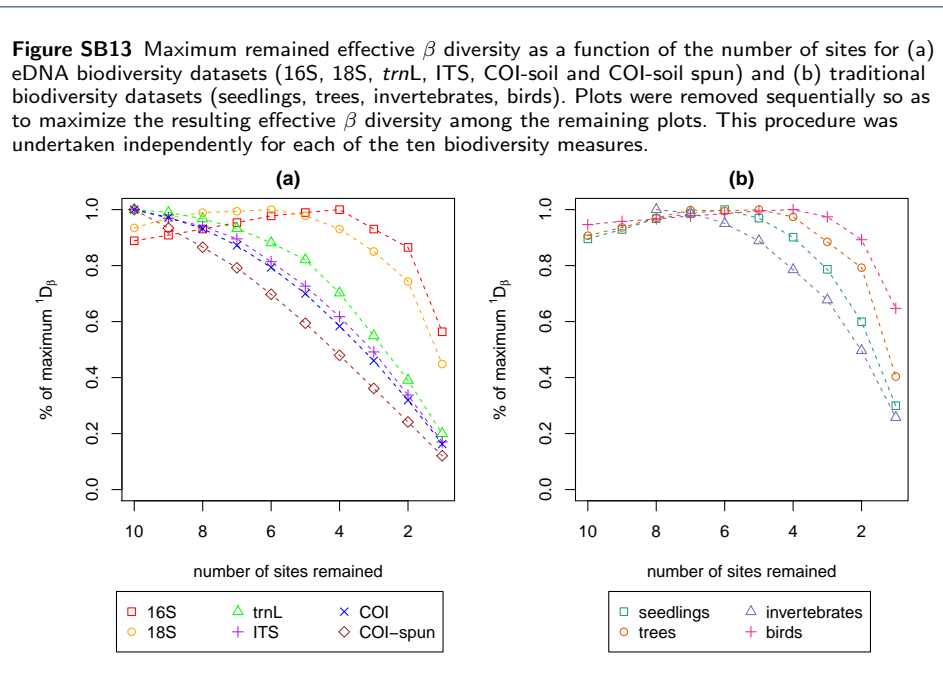

**Figure SB14** Models constructed by the combined set of variables with VIF < 10 using distance-based redundancy analysis for the molecular datasets 16S, 18S, *trnL*, ITS, COI, and COI-spun.

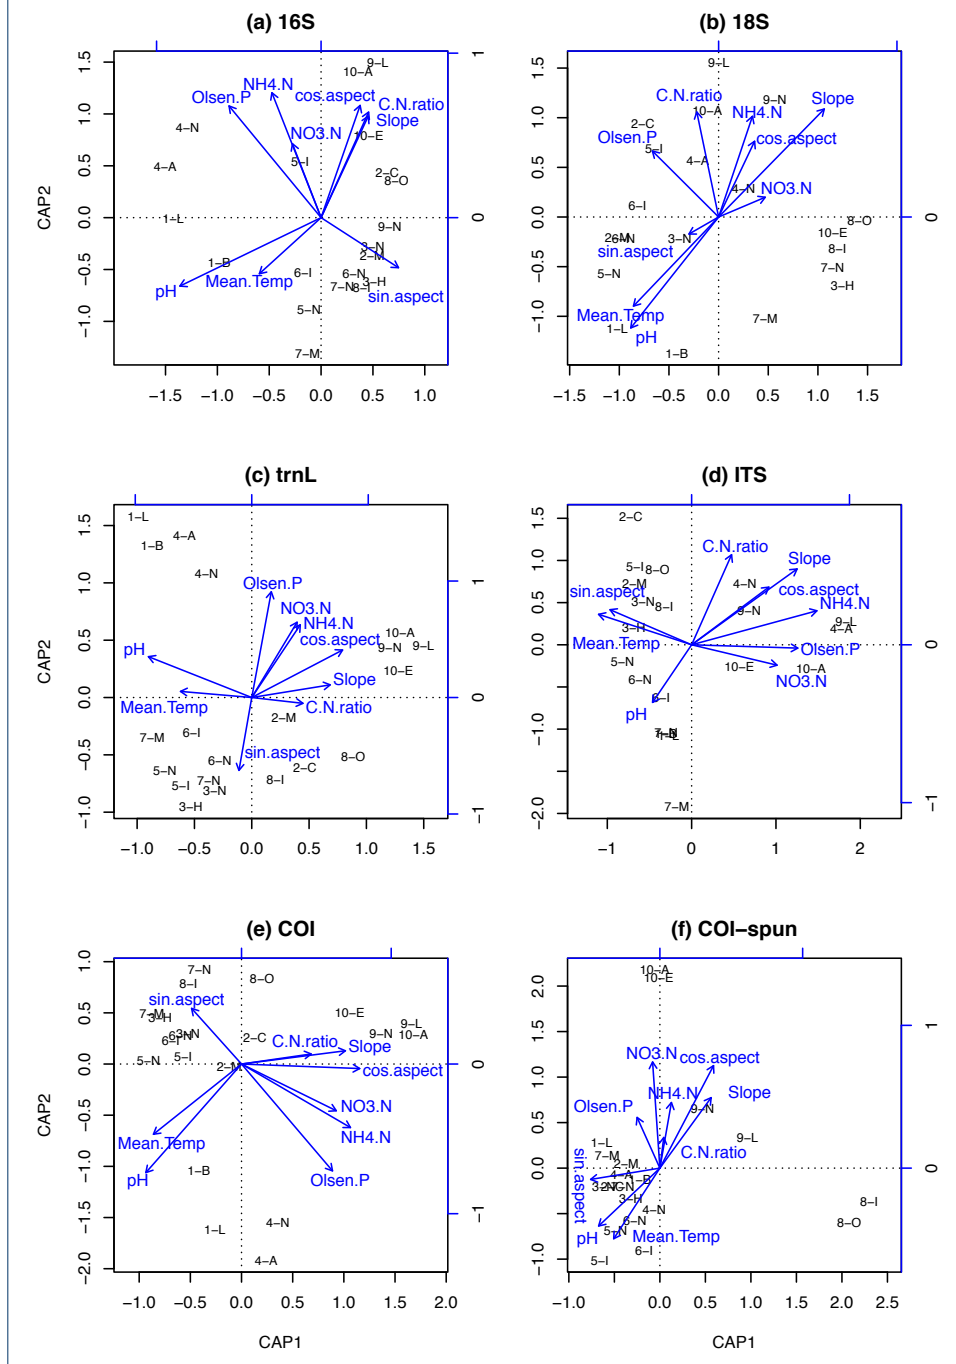

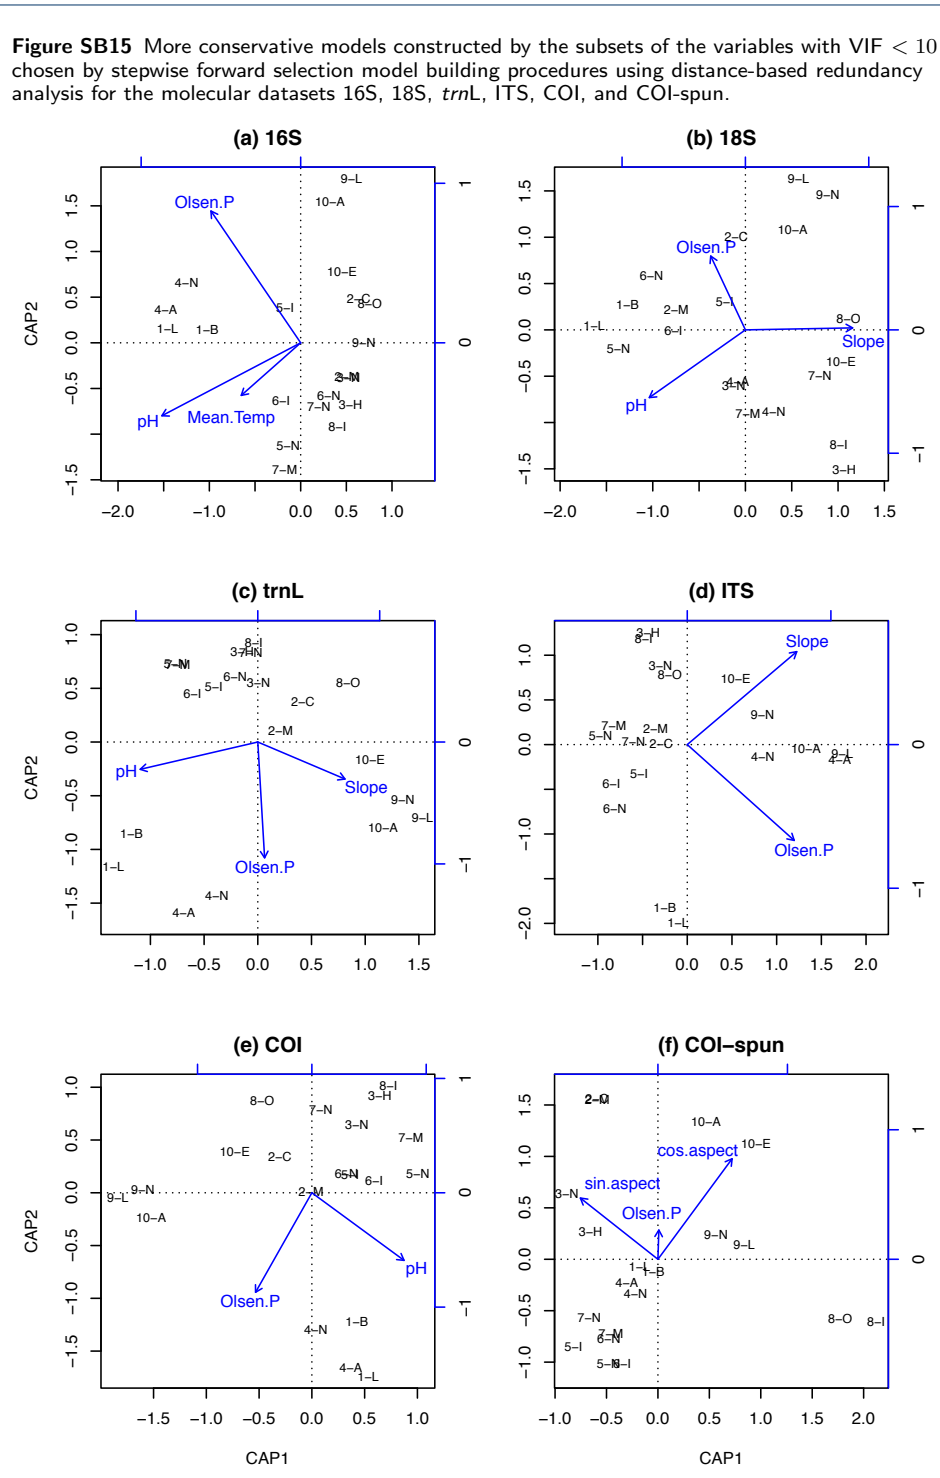

**Figure SB16** More conservative models constructed by the subsets of the variables with VIF < 10 chosen by stepwise backward selection model building procedures using distance-based redundancy analysis for the molecular datasets 16S, 18S, *trnL*, ITS, COI, and COI-spun.

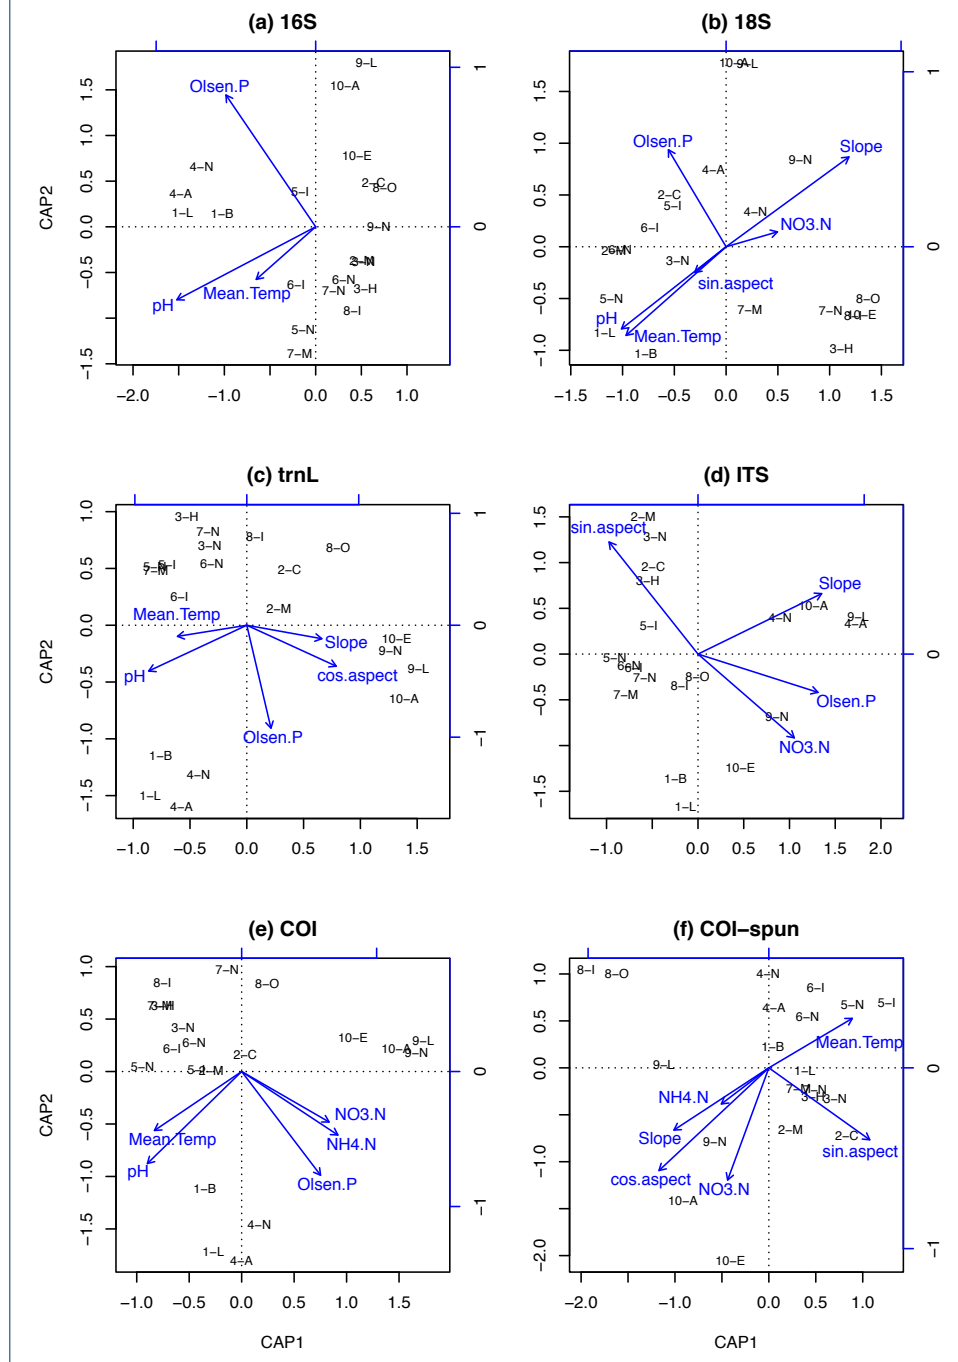

**Table SB1** Table of sequences per plot for 16S, 18S, *trnL*, ITS, COI, and COI-spun molecular datasets.

|        | 16S    | 18S     | <i>trnL</i> | ITS    | COI   | COI-spun | Total   |
|--------|--------|---------|-------------|--------|-------|----------|---------|
| Plot1  | 63,878 | 27,317  | 12,236      | 9,794  | 9,522 | 11,102   | 133,849 |
| Plot2  | 46,891 | 100,338 | 17,756      | 19,355 | 7,689 | 7,886    | 199,915 |
| Plot3  | 47,637 | 34,089  | 9,926       | 12,430 | 6,584 | 7,820    | 118,486 |
| Plot4  | 59,431 | 50,368  | 13,264      | 14,330 | 6,722 | 6,104    | 150,219 |
| Plot5  | 92,724 | 86,554  | 13,802      | 17,783 | 9,835 | 4,448    | 225,146 |
| Plot6  | 37,248 | 78,034  | 13,705      | 12,093 | 8,584 | 3,608    | 153,272 |
| Plot7  | 52,608 | 15,016  | 10,868      | 3,824  | 5,637 | 5,316    | 93,269  |
| Plot8  | 54,367 | 17,812  | 20,655      | 23,229 | 7,731 | 5,766    | 129,560 |
| Plot9  | 50,374 | 73,877  | 12,046      | 11,630 | 7,560 | 5,021    | 160,508 |
| Plot10 | 50,400 | 35,002  | 19,911      | 4,569  | 7,827 | 5,028    | 122,737 |

**Table SB2** Table of OTUs per plot for 16S, 18S, *trnL*, ITS, COI, and COI-spun molecular datasets.

|        | 16S   | 18S   | <i>trnL</i> | ITS | COI   | COI-spun | Total* |
|--------|-------|-------|-------------|-----|-------|----------|--------|
| Plot1  | 2,012 | 1,031 | 2,286       | 451 | 1,314 | 143      | 7,237  |
| Plot2  | 1,946 | 1,125 | 2,504       | 631 | 1,376 | 434      | 8,016  |
| Plot3  | 1,812 | 839   | 2,335       | 611 | 1,137 | 272      | 7,006  |
| Plot4  | 3,133 | 1,560 | 2,286       | 763 | 1,137 | 223      | 9,102  |
| Plot5  | 3,276 | 1,852 | 2,956       | 734 | 1,632 | 112      | 10,562 |
| Plot6  | 2,150 | 1,498 | 3,003       | 585 | 1,119 | 96       | 8,451  |
| Plot7  | 2,123 | 505   | 2,594       | 444 | 709   | 86       | 6,461  |
| Plot8  | 1,953 | 640   | 1,859       | 533 | 1,189 | 149      | 6,323  |
| Plot9  | 1,989 | 980   | 1,379       | 359 | 877   | 123      | 5,707  |
| Plot10 | 2,264 | 1,088 | 1,875       | 391 | 1,320 | 119      | 7,057  |

**Table SB3** Table of Shannon index per plot for 16S, 18S, *trnL*, ITS, COI, and COI-spun molecular datasets.

|        | 16S    | 18S    | <i>trnL</i> | ITS    | COI    | COI-spun |
|--------|--------|--------|-------------|--------|--------|----------|
| Plot1  | 255.61 | 99.52  | 898.09      | 43.59  | 522.09 | 10.95    |
| Plot2  | 192.68 | 57.34  | 569.27      | 61.94  | 656.28 | 91.95    |
| Plot3  | 142.04 | 42.20  | 853.05      | 90.06  | 361.07 | 13.54    |
| Plot4  | 571.37 | 184.98 | 1,019.56    | 141.93 | 589.35 | 22.96    |
| Plot5  | 345.30 | 100.95 | 1,222.87    | 86.08  | 666.75 | 13.66    |
| Plot6  | 309.60 | 70.70  | 1,207.66    | 84.12  | 523.90 | 8.94     |
| Plot7  | 286.85 | 32.09  | 1,412.53    | 76.14  | 186.53 | 5.51     |
| Plot8  | 189.31 | 32.96  | 276.45      | 19.87  | 472.69 | 6.98     |
| Plot9  | 245.25 | 56.49  | 316.49      | 46.78  | 434.71 | 18.78    |
| Plot10 | 342.21 | 96.52  | 328.61      | 46.62  | 697.62 | 17.17    |

\* the total number of OTUs is just each number for each dataset added together.

**Table SB4** Mantel statistic *r* and its significance using Mantel's test based on 4,999 permutations, and *R*<sup>2</sup> and *p-value* for a linear model of the regression of effective  $\beta$  diversity and difference in elevation in Figure SB6.

|               | Mantel statistic <i>r</i> | significance | <i>R</i> <sup>2</sup> | <i>p-value</i> |
|---------------|---------------------------|--------------|-----------------------|----------------|
| 16S           | 0.158                     | 0.1864       | 0.0249                | 0.301          |
| 18S           | 0.481                     | 0.0038       | 0.231                 | 0.000823       |
| <i>trnL</i>   | 0.231                     | 0.102        | 0.0535                | 0.126          |
| ITS           | 0.278                     | 0.0482       | 0.0771                | 0.0648         |
| COI           | 0.489                     | 0.0036       | 0.239                 | 0.000658       |
| COI-spun      | 0.399                     | 0.0026       | 0.159                 | 0.00670        |
| seedlings     | 0.672                     | 4e-04        | 0.451                 | 4.37e-07       |
| trees         | 0.827                     | 2e-04        | 0.684                 | 2.51e-12       |
| invertebrates | 0.813                     | 0.0026       | 0.661                 | 1.48e-07       |
| birds         | 0.096                     | 0.3124       | 0.00929               | 0.529          |



**Table SB5** The significance test of effective  $\alpha$  diversity as a function of elevation in Figure SB7.

|               | R <sup>2</sup> | <i>p-value</i> |
|---------------|----------------|----------------|
| 16S           | 0.0159         | 0.596          |
| 18S           | 0.0105         | 0.667          |
| trnL          | 0.201          | 0.0476         |
| ITS           | 0.0915         | 0.195          |
| COI           | 0.00139        | 0.876          |
| COI-spun      | 0.0304         | 0.463          |
| seedlings     | 0.379          | 0.0582         |
| trees         | 0.501          | 0.0219         |
| invertebrates | 0.386          | 0.100          |
| birds         | 0.185          | 0.215          |

**Table SB6** Pairwise community matrix Procrustes analysis of effective  $\beta$  diversity within and between the eDNA datasets and traditional datasets, estimated as a sum of squared differences and their significance in parentheses is based on 4,999 permutations.

|           | 16S               | 18S              | trnL              | ITS              | COI              | COI-spun        | seedlings        | trees           | inverts        |
|-----------|-------------------|------------------|-------------------|------------------|------------------|-----------------|------------------|-----------------|----------------|
| 18S       | 0.57<br>(0.017)   |                  |                   |                  |                  |                 |                  |                 |                |
| trnL      | 0.34<br>(0.00040) | 0.55<br>(0.016)  |                   |                  |                  |                 |                  |                 |                |
| ITS       | 0.59<br>(0.017)   | 0.65<br>(0.074)  | 0.34<br>(0.0012)  |                  |                  |                 |                  |                 |                |
| COI       | 0.44<br>(0.0024)  | 0.47<br>(0.0040) | 0.11<br>(0.00040) | 0.47<br>(0.0070) |                  |                 |                  |                 |                |
| COI-spun  | 0.82<br>(0.37)    | 0.70<br>(0.11)   | 0.85<br>(0.53)    | 0.78<br>(0.28)   | 0.78<br>(0.27)   |                 |                  |                 |                |
| seedlings | 0.48<br>(0.011)   | 0.41<br>(0.0012) | 0.50<br>(0.011)   | 0.47<br>(0.0038) | 0.44<br>(0.0014) | 0.81<br>(0.38)  |                  |                 |                |
| trees     | 0.63<br>(0.047)   | 0.44<br>(0.0040) | 0.69<br>(0.10)    | 0.72<br>(0.13)   | 0.61<br>(0.038)  | 0.53<br>(0.012) | 0.42<br>(0.0018) |                 |                |
| inverts   | 0.67<br>(0.15)    | 0.41<br>(0.0090) | 0.34<br>(0.0092)  | 0.36<br>(0.0054) | 0.26<br>(0.0044) | 0.70<br>(0.23)  | 0.28<br>(0.0014) | 0.54<br>(0.047) |                |
| birds     | 0.88<br>(0.54)    | 0.55<br>(0.012)  | 0.87<br>(0.58)    | 0.85<br>(0.48)   | 0.83<br>(0.41)   | 0.66<br>(0.068) | 0.75<br>(0.20)   | 0.67<br>(0.073) | 0.63<br>(0.12) |

**Table SB7** Pairwise community matrix correlations of effective  $\beta$  diversity within and between the eDNA datasets and traditional datasets, Mantel statistic *r*, and their significance in parentheses using Mantel's test based on 4,999 permutations.

|           | 16S               | 18S               | trnL              | ITS               | COI                | COI-spun          | seedlings         | trees              | inverts           |
|-----------|-------------------|-------------------|-------------------|-------------------|--------------------|-------------------|-------------------|--------------------|-------------------|
| 18S       | 0.482<br>(0.0036) |                   |                   |                   |                    |                   |                   |                    |                   |
| trnL      | 0.814<br>(2e-04)  | 0.584<br>(2e-04)  |                   |                   |                    |                   |                   |                    |                   |
| ITS       | 0.431<br>(0.0176) | 0.574<br>(2e-04)  | 0.614<br>(4e-04)  |                   |                    |                   |                   |                    |                   |
| COI       | 0.635<br>(2e-04)  | 0.586<br>(4e-04)  | 0.816<br>(2e-04)  | 0.607<br>(6e-04)  |                    |                   |                   |                    |                   |
| COI-spun  | 0.341<br>(0.0338) | 0.558<br>(2e-04)  | 0.403<br>(0.0108) | 0.604<br>(6e-04)  | 0.45<br>(0.003)    |                   |                   |                    |                   |
| seedlings | 0.501<br>(0.0502) | 0.541<br>(0.0022) | 0.501<br>(0.0302) | 0.482<br>(0.0026) | 0.68<br>(2e-04)    | 0.428<br>(0.0042) |                   |                    |                   |
| trees     | 0.261<br>(0.1036) | 0.552<br>(0.002)  | 0.348<br>(0.0542) | 0.402<br>(0.0074) | 0.611<br>(2e-04)   | 0.431<br>(0.0022) | 0.816<br>(2e-04)  |                    |                   |
| inverts   | 0.325<br>(0.1032) | 0.694<br>(8e-04)  | 0.536<br>(0.0314) | 0.504<br>(0.0032) | 0.802<br>(4e-04)   | 0.611<br>(0.0066) | 0.827<br>(0.0014) | 0.827<br>(0.0044)  |                   |
| birds     | -0.016<br>(0.414) | 0.292<br>(0.0932) | 0.064<br>(0.3394) | 0.125<br>(0.2278) | -0.145<br>(0.7008) | 0.021<br>(0.4202) | -0.046<br>(0.503) | -0.024<br>(0.4874) | -0.031<br>(0.501) |

**Table SB8** Ranking sampling plots by removing plots sequentially so as to minimize the loss of overall  $\gamma$  diversity among the remaining plots from Figure SB12. 1 is the most important and is removed last, 10 is the least important and is removed at the beginning.

| Plot name | 16S | 18S | <i>trnL</i> | ITS | COI | COI-spun | seedlings | trees | inverts | birds |
|-----------|-----|-----|-------------|-----|-----|----------|-----------|-------|---------|-------|
| Plot1     | 6   | 8   | 4           | 4   | 3   | 4        | 5         | 4     | 8       | 2     |
| Plot2     | 8   | 5   | 7           | 3   | 4   | 1        | 6         | 3     | 6       | 10    |
| Plot3     | 10  | 7   | 8           | 5   | 8   | 2        | 4         | 7     | 4       | 1     |
| Plot4     | 2   | 2   | 3           | 1   | 5   | 3        | 2         | 6     | 2       | 9     |
| Plot5     | 1   | 1   | 2           | 2   | 1   | 9        | 1         | 1     | 7       | 8     |
| Plot6     | 9   | 4   | 1           | 7   | 6   | 10       | 10        | 10    | 5       | 7     |
| Plot7     | 4   | 9   | 5           | 8   | 10  | 8        | 8         | 5     |         | 3     |
| Plot8     | 5   | 10  | 10          | 6   | 7   | 6        | 7         | 9     |         | 6     |
| Plot9     | 7   | 6   | 9           | 10  | 9   | 5        | 3         | 2     | 1       | 5     |
| Plot10    | 3   | 3   | 6           | 9   | 2   | 7        | 9         | 8     | 3       | 4     |

**Table SB9** Means and standard deviations of Table SB8 between eDNA datasets for ranking plots to minimize the loss of overall  $\gamma$  diversity among the remaining plots.

|        | eDNA       | Traditional | Traditional No Birds | All        | All No Birds |
|--------|------------|-------------|----------------------|------------|--------------|
| Plot1  | 4.8 ± 1.83 | 4.8 ± 2.50  | 5.7 ± 2.08           | 4.8 ± 1.99 | 5.1 ± 1.83   |
| Plot2  | 4.7 ± 2.58 | 6.2 ± 2.87  | 5.0 ± 1.73           | 5.3 ± 2.67 | 4.8 ± 2.22   |
| Plot3  | 6.7 ± 2.80 | 4.0 ± 2.45  | 5.0 ± 1.73           | 5.6 ± 2.88 | 6.1 ± 2.52   |
| Plot4  | 2.7 ± 1.37 | 4.8 ± 3.40  | 3.3 ± 2.31           | 3.5 ± 2.46 | 2.9 ± 1.62   |
| Plot5  | 2.7 ± 3.14 | 4.2 ± 3.77  | 3.0 ± 3.46           | 3.3 ± 3.30 | 2.8 ± 3.03   |
| Plot6  | 6.2 ± 3.31 | 8.0 ± 2.45  | 8.3 ± 2.89           | 6.9 ± 3.00 | 6.9 ± 3.18   |
| Plot7  | 7.3 ± 2.34 | 5.3 ± 2.52  | 6.5 ± 2.12           | 6.7 ± 2.45 | 7.1 ± 2.17   |
| Plot8  | 7.3 ± 2.16 | 7.3 ± 1.53  | 8.0 ± 1.41           | 7.3 ± 1.87 | 7.5 ± 1.93   |
| Plot9  | 7.7 ± 1.97 | 2.8 ± 1.71  | 2.0 ± 1.00           | 5.7 ± 3.09 | 5.8 ± 3.27   |
| Plot10 | 5.0 ± 2.76 | 6.0 ± 2.94  | 6.7 ± 3.21           | 5.4 ± 2.72 | 5.6 ± 2.83   |

**Table SB10** Spearman correlations and their significance in parentheses of Table SB8 between eDNA datasets for ranking plots to minimize the loss of overall  $\gamma$  diversity among the remaining plots.

|             | 16S              | 18S              | <i>trnL</i>     | ITS             | COI              | COI-spun         | seedlings       | trees           | inverts | birds |
|-------------|------------------|------------------|-----------------|-----------------|------------------|------------------|-----------------|-----------------|---------|-------|
| 18S         | 0.41<br>(0.25)   |                  |                 |                 |                  |                  |                 |                 |         |       |
| <i>trnL</i> | 0.31<br>(0.39)   | 0.60<br>(0.073)  |                 |                 |                  |                  |                 |                 |         |       |
| ITS         | 0.26<br>(0.47)   | 0.37<br>(0.30)   | 0.39<br>(0.26)  |                 |                  |                  |                 |                 |         |       |
| COI         | 0.44<br>(0.20)   | 0.64<br>(0.054)  | 0.45<br>(0.19)  | 0.49<br>(0.15)  |                  |                  |                 |                 |         |       |
| COI-spun    | -0.33<br>(0.35)  | -0.16<br>(0.66)  | -0.48<br>(0.17) | 0.37<br>(0.30)  | -0.067<br>(0.86) |                  |                 |                 |         |       |
| seedlings   | 0.31<br>(0.39)   | 0.33<br>(0.35)   | 0.0061<br>(1.0) | 0.56<br>(0.096) | 0.16<br>(0.66)   | 0.37<br>(0.30)   |                 |                 |         |       |
| trees       | 0.26<br>(0.47)   | 0.21<br>(0.56)   | 0.018<br>(0.97) | 0.26<br>(0.47)  | 0.19<br>(0.61)   | 0.21<br>(0.56)   | 0.70<br>(0.031) |                 |         |       |
| inverts     | -0.048<br>(0.93) | 0.14<br>(0.75)   | -0.43<br>(0.30) | -0.40<br>(0.33) | -0.60<br>(0.13)  | 0.048<br>(0.93)  | 0.12<br>(0.79)  | -0.19<br>(0.66) |         |       |
| birds       | -0.27<br>(0.45)  | -0.56<br>(0.096) | -0.27<br>(0.45) | -0.48<br>(0.17) | -0.35<br>(0.33)  | -0.0061<br>(1.0) | -0.19<br>(0.61) | -0.18<br>(0.63) | 0 (1.0) |       |

**Table SB11** Ranking sampling plots by removing plots sequentially so as to maximize the resulting effective  $\beta$  diversity among the remaining plots from Figure SB13. 1 is the most important and is removed last, 10 is the least important and is removed at the beginning.

| Plot name | 16S | 18S | trnL | ITS | COI | COI-spun | seedlings | trees | inverts | birds |
|-----------|-----|-----|------|-----|-----|----------|-----------|-------|---------|-------|
| Plot1     | 2   | 2   | 2    | 2   | 4   | 2        | 2         | 2     | 2       | 3     |
| Plot2     | 7   | 9   | 10   | 8   | 8   | 6        | 8         | 7     | 7       | 8     |
| Plot3     | 4   | 4   | 5    | 3   | 5   | 8        | 5         | 5     | 3       | 2     |
| Plot4     | 3   | 5   | 3    | 6   | 2   | 7        | 6         | 6     | 5       | 5     |
| Plot5     | 10  | 10  | 8    | 10  | 10  | 10       | 10        | 10    | 8       | 1     |
| Plot6     | 9   | 7   | 6    | 5   | 7   | 4        | 4         | 3     | 6       | 7     |
| Plot7     | 6   | 1   | 4    | 7   | 1   | 3        | 7         | 9     |         | 4     |
| Plot8     | 8   | 6   | 9    | 4   | 9   | 5        | 9         | 8     |         | 6     |
| Plot9     | 5   | 8   | 1    | 9   | 3   | 9        | 3         | 1     | 1       | 10    |
| Plot10    | 1   | 3   | 7    | 1   | 6   | 1        | 1         | 4     | 4       | 9     |

**Table SB12** Means and standard deviations of Table SB11 between eDNA datasets for ranking plots to maximize effective  $\beta$  diversity among the remaining plots.

|        | eDNA        | Traditional | Traditional No Birds | All         | All No Birds |
|--------|-------------|-------------|----------------------|-------------|--------------|
| Plot1  | 2.3 ± 0.816 | 2.2 ± 0.500 | 2.0 ± 0              | 2.3 ± 0.675 | 2.2 ± 0.667  |
| Plot2  | 8.0 ± 1.41  | 7.5 ± 0.577 | 7.3 ± 0.577          | 7.8 ± 1.14  | 7.8 ± 1.20   |
| Plot3  | 4.8 ± 1.72  | 3.8 ± 1.50  | 4.3 ± 1.15           | 4.4 ± 1.65  | 4.7 ± 1.50   |
| Plot4  | 4.3 ± 1.97  | 5.5 ± 0.577 | 5.7 ± 0.577          | 4.8 ± 1.62  | 4.8 ± 1.72   |
| Plot5  | 9.7 ± 0.816 | 7.2 ± 4.27  | 9.3 ± 1.15           | 8.7 ± 2.83  | 9.6 ± 0.882  |
| Plot6  | 6.3 ± 1.75  | 5.0 ± 1.83  | 4.3 ± 1.53           | 5.8 ± 1.81  | 5.7 ± 1.87   |
| Plot7  | 3.7 ± 2.50  | 6.7 ± 2.52  | 8.0 ± 1.41           | 4.7 ± 2.78  | 4.8 ± 2.96   |
| Plot8  | 6.8 ± 2.14  | 7.7 ± 1.53  | 8.5 ± 0.707          | 7.1 ± 1.90  | 7.2 ± 1.98   |
| Plot9  | 5.8 ± 3.37  | 3.8 ± 4.27  | 1.7 ± 1.15           | 5.0 ± 3.68  | 4.4 ± 3.43   |
| Plot10 | 3.2 ± 2.71  | 4.5 ± 3.32  | 3.0 ± 1.73           | 3.7 ± 2.87  | 3.1 ± 2.32   |

**Table SB13** Spearman correlations and their significance in parentheses of Table SB11 between eDNA datasets for ranking plots to maximize effective  $\beta$  diversity among the remaining plots.

|           | 16S             | 18S             | trnL             | ITS              | COI              | COI-spun        | seedlings        | trees           | inverts         | birds |
|-----------|-----------------|-----------------|------------------|------------------|------------------|-----------------|------------------|-----------------|-----------------|-------|
| 18S       | 0.67<br>(0.039) |                 |                  |                  |                  |                 |                  |                 |                 |       |
| trnL      | 0.52<br>(0.13)  | 0.43<br>(0.22)  |                  |                  |                  |                 |                  |                 |                 |       |
| ITS       | 0.64<br>(0.054) | 0.68<br>(0.035) | 0.055<br>(0.89)  |                  |                  |                 |                  |                 |                 |       |
| COI       | 0.60<br>(0.073) | 0.65<br>(0.049) | 0.83<br>(0.0056) | 0.091<br>(0.81)  |                  |                 |                  |                 |                 |       |
| COI-spun  | 0.44<br>(0.20)  | 0.71<br>(0.028) | -0.0061<br>(1.0) | 0.71<br>(0.028)  | 0.20<br>(0.58)   |                 |                  |                 |                 |       |
| seedlings | 0.75<br>(0.018) | 0.48<br>(0.17)  | 0.58<br>(0.088)  | 0.60<br>(0.073)  | 0.45<br>(0.19)   | 0.50<br>(0.14)  |                  |                 |                 |       |
| trees     | 0.52<br>(0.13)  | 0.15<br>(0.68)  | 0.60<br>(0.073)  | 0.38<br>(0.28)   | 0.33<br>(0.35)   | 0.21<br>(0.56)  | 0.88<br>(0.0020) |                 |                 |       |
| inverts   | 0.62<br>(0.11)  | 0.62<br>(0.11)  | 0.86<br>(0.011)  | 0.40<br>(0.33)   | 0.76<br>(0.037)  | 0.14<br>(0.75)  | 0.74<br>(0.046)  | 0.83<br>(0.015) |                 |       |
| birds     | -0.16<br>(0.66) | 0.18<br>(0.63)  | 0.018<br>(0.97)  | -0.0061<br>(1.0) | -0.067<br>(0.86) | -0.22<br>(0.54) | -0.41<br>(0.25)  | -0.48<br>(0.17) | -0.33<br>(0.43) |       |

**Table SB14** Distance-based redundancy analysis and their ANOVA tests in each step for the eDNA biodiversity datasets (16S, 18S, *trnL*).

|                    | All     |            |        | VIF < 10 | Forward | Backward |
|--------------------|---------|------------|--------|----------|---------|----------|
|                    | Inertia | Proportion | Pr(>F) | Pr(>F)   | Pr(>F)  | Pr(>F)   |
| <b>16S</b>         |         |            |        |          |         |          |
| Elevation          | 0.48    | 9.8%       | 0.01   |          |         |          |
| Slope              | 0.43    | 8.8%       | 0.06   | 0.006    |         |          |
| Aspect             | 0.36    | 7.5%       | 0.14   |          |         |          |
| Mean.Temp          | 0.42    | 8.6%       | 0.09   | 0.028    | 0.001   | 0.015    |
| cos.aspect         | 0.45    | 9.2%       | 0.03   | 0.052    |         |          |
| sin.aspect         | 0.43    | 8.8%       | 0.07   | 0.001    |         |          |
| Water.Content      | 0.50    | 10.2%      | 0.02   |          |         |          |
| pH                 | 0.94    | 19.2%      | 0.01   | 0.008    | 0.001   | 0.001    |
| EC                 | 0.61    | 12.5%      | 0.01   |          |         |          |
| Organic.C          | 0.56    | 11.5%      | 0.01   |          |         |          |
| Total.N            | 0.52    | 10.7%      | 0.01   |          |         |          |
| C.N.ratio          | 0.44    | 9.0%       | 0.04   | 0.142    |         |          |
| NO3.N              | 0.28    | 5.7%       | 0.31   | 0.433    |         |          |
| NH4.N              | 0.50    | 10.1%      | 0.03   | 0.139    |         |          |
| Olsen.P            | 0.67    | 13.8%      | 0.01   | 0.593    | 0.058   | 0.001    |
| <b>18S</b>         |         |            |        |          |         |          |
| Elevation          | 0.64    | 9.14%      | 0.01   |          |         |          |
| Slope              | 0.62    | 8.87%      | 0.01   | 0.004    | 0.007   | 0.003    |
| Aspect             | 0.45    | 6.46%      | 0.13   |          |         |          |
| Mean.Temp          | 0.56    | 8.01%      | 0.04   | 0.08     |         | 0.067    |
| cos.aspect         | 0.37    | 5.23%      | 0.42   | 0.288    |         |          |
| sin.aspect         | 0.36    | 5.14%      | 0.47   | 0.191    |         | 0.249    |
| Water.Content      | 0.63    | 8.98%      | 0.01   |          |         |          |
| pH                 | 0.60    | 8.53%      | 0.01   | 0.022    | 0.047   | 0.023    |
| EC                 | 0.45    | 6.48%      | 0.14   |          |         |          |
| Organic.C          | 0.55    | 7.81%      | 0.04   |          |         |          |
| Total.N            | 0.55    | 7.83%      | 0.03   |          |         |          |
| C.N.ratio          | 0.41    | 5.91%      | 0.23   | 0.037    |         |          |
| NO3.N              | 0.38    | 5.42%      | 0.45   | 0.764    |         | 0.356    |
| NH4.N              | 0.46    | 6.56%      | 0.11   | 0.011    |         |          |
| Olsen.P            | 0.47    | 6.64%      | 0.11   | 0.36     | 0.043   | 0.002    |
| <b><i>trnL</i></b> |         |            |        |          |         |          |
| Elevation          | 0.63    | 7.40%      | 0.01   |          |         |          |
| Slope              | 0.63    | 7.33%      | 0.01   | 0.001    | 0.001   | 0.001    |
| Aspect             | 0.56    | 6.58%      | 0.01   |          |         |          |
| Mean.Temp          | 0.60    | 6.96%      | 0.01   | 0.008    |         | 0.005    |
| cos.aspect         | 0.68    | 7.95%      | 0.01   | 0.001    |         | 0.001    |
| sin.aspect         | 0.54    | 6.25%      | 0.07   | 0.009    |         |          |
| Water.Content      | 0.68    | 7.93%      | 0.01   |          |         |          |
| pH                 | 0.73    | 8.47%      | 0.01   | 0.043    | 0.001   | 0.002    |
| EC                 | 0.62    | 7.27%      | 0.01   |          |         |          |
| Organic.C          | 0.67    | 7.83%      | 0.01   |          |         |          |
| Total.N            | 0.66    | 7.70%      | 0.01   |          |         |          |
| C.N.ratio          | 0.51    | 5.94%      | 0.10   | 0.508    |         |          |
| NO3.N              | 0.57    | 6.61%      | 0.03   | 0.072    |         |          |
| NH4.N              | 0.60    | 7.00%      | 0.01   | 0.513    |         |          |
| Olsen.P            | 0.66    | 7.69%      | 0.01   | 0.145    | 0.048   | 0.017    |

**Table SB15** Distance-based redundancy analysis and the ANOVA tests in each step for the eDNA biodiversity datasets (ITS, COI-soil and COI-soil spun).

| ITS           | All     |            |        | VIF<<br>10 | Forward | Backward |
|---------------|---------|------------|--------|------------|---------|----------|
|               | Inertia | Proportion | Pr(>F) | Pr(>F)     | Pr(>F)  | Pr(>F)   |
| Elevation     | 0.61    | 6.73%      | 0.01   |            |         |          |
| Slope         | 0.65    | 7.27%      | 0.01   | 0.001      | 0.001   | 0.002    |
| Aspect        | 0.65    | 7.22%      | 0.01   |            |         |          |
| Mean.Temp     | 0.59    | 6.59%      | 0.03   | 0.056      |         |          |
| cos.aspect    | 0.58    | 6.41%      | 0.04   | 0.103      |         |          |
| sin.aspect    | 0.59    | 6.51%      | 0.04   | 0.043      |         | 0.01     |
| Water.Content | 0.70    | 7.82%      | 0.01   |            |         |          |
| pH            | 0.48    | 5.35%      | 0.36   | 0.111      |         |          |
| EC            | 0.68    | 7.51%      | 0.01   |            |         |          |
| Organic.C     | 0.72    | 7.99%      | 0.01   |            |         |          |
| Total.N       | 0.73    | 8.06%      | 0.01   |            |         |          |
| C.N.ratio     | 0.51    | 5.70%      | 0.14   | 0.167      |         |          |
| NO3.N         | 0.58    | 6.49%      | 0.01   | 0.223      |         | 0.14     |
| NH4.N         | 0.68    | 7.59%      | 0.01   | 0.17       |         |          |
| Olsen.P       | 0.65    | 7.20%      | 0.01   | 0.042      | 0.003   | 0.018    |
| COI           | Inertia | Proportion | Pr(>F) | Pr(>F)     | Pr(>F)  | Pr(>F)   |
| Elevation     | 0.61    | 6.80%      | 0.01   |            |         |          |
| Slope         | 0.58    | 6.47%      | 0.01   | 0.001      |         |          |
| Aspect        | 0.55    | 6.16%      | 0.02   |            |         |          |
| Mean.Temp     | 0.60    | 6.61%      | 0.01   | 0.004      |         | 0.001    |
| cos.aspect    | 0.60    | 6.68%      | 0.01   | 0.007      |         |          |
| sin.aspect    | 0.52    | 5.80%      | 0.11   | 0.006      |         |          |
| Water.Content | 0.65    | 7.26%      | 0.01   |            |         |          |
| pH            | 0.65    | 7.20%      | 0.01   | 0.044      | 0.001   | 0.002    |
| EC            | 0.62    | 6.94%      | 0.01   |            |         |          |
| Organic.C     | 0.65    | 7.24%      | 0.01   |            |         |          |
| Total.N       | 0.64    | 7.14%      | 0.01   |            |         |          |
| C.N.ratio     | 0.53    | 5.91%      | 0.03   | 0.23       |         |          |
| NO3.N         | 0.57    | 6.38%      | 0.01   | 0.16       |         | 0.002    |
| NH4.N         | 0.61    | 6.76%      | 0.01   | 0.259      |         | 0.006    |
| Olsen.P       | 0.64    | 7.08%      | 0.01   | 0.202      | 0.001   | 0.038    |
| COI-spun      | Inertia | Proportion | Pr(>F) | Pr(>F)     | Pr(>F)  | Pr(>F)   |
| Elevation     | 0.61    | 6.56%      | 0.01   |            |         |          |
| Slope         | 0.57    | 6.08%      | 0.03   | 0.007      |         | 0.006    |
| Aspect        | 0.61    | 6.55%      | 0.01   |            |         |          |
| Mean.Temp     | 0.57    | 6.10%      | 0.03   | 0.023      |         | 0.017    |
| cos.aspect    | 0.61    | 6.51%      | 0.01   | 0.013      | 0.001   | 0.01     |
| sin.aspect    | 0.59    | 6.32%      | 0.01   | 0.003      | 0.008   | 0.005    |
| Water.Content | 0.60    | 6.42%      | 0.01   |            |         |          |
| pH            | 0.54    | 5.83%      | 0.09   | 0.049      |         |          |
| EC            | 0.51    | 5.44%      | 0.32   |            |         |          |
| Organic.C     | 0.53    | 5.74%      | 0.09   |            |         |          |
| Total.N       | 0.54    | 5.84%      | 0.09   |            |         |          |
| C.N.ratio     | 0.45    | 4.82%      | 0.88   | 0.895      |         |          |
| NO3.N         | 0.55    | 5.92%      | 0.07   | 0.046      |         | 0.01     |
| NH4.N         | 0.53    | 5.69%      | 0.13   | 0.057      |         | 0.01     |
| Olsen.P       | 0.51    | 5.50%      | 0.28   | 0.236      | 0.011   |          |

**Table SB16** The constrained and unconstrained inertia changes during distance-based redundancy analysis for the eDNA biodiversity datasets (16S, 18S, *trnL*, ITS, COI-soil and COI-soil spun).

|               | All     |          | VIF < 10 |          | Forward |          | Backward |            |
|---------------|---------|----------|----------|----------|---------|----------|----------|------------|
|               | Inertia | Proport. | Inertia  | Proport. | Inertia | Proport. | Inertia  | Proportion |
| 16S           |         |          |          |          |         |          |          |            |
| Constrained   | 4.17    | 85.2%    | 3.02     | 61.7%    | 1.86    | 38.1%    | 1.86     | 38.1%      |
| Unconstrained | 0.72    | 14.8%    | 1.87     | 38.3%    | 3.03    | 61.9%    | 3.03     | 61.9%      |
| 18S           |         |          |          |          |         |          |          |            |
| Constrained   | 5.85    | 83.4%    | 3.83     | 54.64%   | 1.59    | 22.7%    | 2.87     | 40.9%      |
| Unconstrained | 1.17    | 16.6%    | 3.18     | 45.36%   | 5.43    | 77.3%    | 4.15     | 59.1%      |
| <i>trnL</i>   |         |          |          |          |         |          |          |            |
| Constrained   | 7.01    | 81.9%    | 4.51     | 52.65%   | 1.89    | 22.1%    | 2.88     | 33.7%      |
| Unconstrained | 1.55    | 18.1%    | 4.05     | 47.35%   | 6.67    | 77.9%    | 5.67     | 66.3%      |
| ITS           |         |          |          |          |         |          |          |            |
| Constrained   | 7.30    | 81.1%    | 4.63     | 51.39%   | 1.27    | 14.1%    | 2.29     | 25.4%      |
| Unconstrained | 1.71    | 18.9%    | 4.38     | 48.61%   | 7.74    | 85.9%    | 6.72     | 74.6%      |
| COI           |         |          |          |          |         |          |          |            |
| Constrained   | 7.31    | 81.3%    | 4.57     | 50.77%   | 1.29    | 14.3%    | 2.77     | 30.7%      |
| Unconstrained | 1.69    | 18.7%    | 4.43     | 49.23%   | 7.71    | 85.7%    | 6.24     | 69.3%      |
| COI-spun      |         |          |          |          |         |          |          |            |
| Constrained   | 7.50    | 80.4%    | 4.71     | 50.57%   | 1.77    | 19%      | 3.34     | 35.9%      |
| Unconstrained | 1.82    | 19.6%    | 4.61     | 49.43%   | 7.55    | 81%      | 5.98     | 64.1%      |
