# Supplementary material for: Evaluating a multigene environmental DNA approach for biodiversity assessment
Source: PubMed Central journal article supplement (PMC4595072; doi:10.1186/s13742-015-0086-1), 2015-10-06
Supplement: 13742_2015_86_MOESM2_ESM.pdf [file 13742_2015_86_MOESM2_ESM.pdf]

## SUPPLEMENTARY INFORMATION A

# Supplementary Information A: Evaluating a multigene environmental DNA approach for biodiversity assessment

Alexei J Drummond<sup>1,2\*</sup>, Richard D Newcomb<sup>1,3,4</sup>, Thomas R Buckley<sup>1,3,5</sup>, Dong Xie<sup>1,2</sup>, Andrew Dopheide<sup>1,3,4</sup>, Benjamin CM Potter<sup>1,3</sup>, Joseph Heled<sup>1,2</sup>, Howard A Ross<sup>1,3</sup>, Leah Tooman<sup>1,4</sup>, Stefanie Grosser<sup>1,5</sup>, Duckchul Park<sup>5</sup>, Nicholas J Demetras<sup>9</sup>, Mark I Stevens<sup>6,7</sup>, James C Russell<sup>1,3,7</sup>, Sandra H Anderson<sup>3</sup>, Anna Carter<sup>1,10</sup> and Nicola Nelson<sup>1,10</sup>

\*Correspondence:

[alexei@cs.auckland.ac.nz](mailto:alexei@cs.auckland.ac.nz)

<sup>1</sup>Allan Wilson Centre, University of Auckland, Auckland, New Zealand  
Full list of author information is available at the end of the article

## OTU identification and informatics

The source code that was used to generate the figures and tables is available from the GitHub project eDNA-pipeline (<https://github.com/walterxie/eDNA-pipeline>).

### OTUs and reads

Figure SA1 shows the number of OTUs (97% similarity threshold) found in  $K$  subplots for  $K = 1, 2, \dots, 20$ . In the tail of the x-axis the 16S and 18S eDNA datasets contained some OTUs that appeared in all (20) of the sampled subplots, but the COI-spun dataset had no such OTUs.

### Taxonomy

BLAST+ was used to classify the taxonomy of the OTUs and MEGAN 5 [1] was used to interpret and visualize the BLAST results, which are illustrated in Figure SA2-SA7 for each dataset.

### Comparison of traditional and eDNA methods

As the main manuscript has described, the traditional and eDNA methods were compared in two ways: firstly, in their ability to detect community differences associated with elevation; and secondly, in a pairwise community correlation analysis. Figure SA8 and Figure SA9 show the regression of community differences against elevation differences for both eDNA and traditional datasets, respectively, using Jaccard and Horn-Morisita dissimilarity indices. Figure SA13 shows the multidimensional scaling of pairwise community matrix correlations of effective  $\beta$  diversity between the eDNA and traditional datasets, which is listed in Table 5.

### Ranking plots by biodiversity contribution

We evaluated all of the possible combinations (210) of the four plots selected from the ten to find the subset of four that maximizes either: (i)  $\gamma$  or (ii) effective  $\beta$  diversity. The subset of the four plots with maximum  $\gamma$  diversity for the eDNA biodiversity datasets (16S, 18S, *trnL*, ITS, COI-soil, and COI-soil spun) and the

traditional biodiversity datasets (seedlings, trees, invertebrates, birds) is illustrated in the heat-maps in Figure SA14. Where there is more than one subset with equal maximum diversity, a lighter colour is used to show the plots involved. Plots 1 and 4 appear to be important contributors to the overall  $\gamma$  diversity for most datasets, and Plot 8 appears to be the least important. Plots 1, 4, and 5 are important for most eDNA datasets, and Plot 9 is important for all traditional biodiversity datasets. Plot 1 (for all data) and Plot 10 are important contributors to the effective  $\beta$  diversity for most datasets, and Plot 2 appears to be the least important.

To discover how the diversities varied as a function of the number of sites, we applied a greedy algorithm to remove the plots sequentially so as to minimize the loss of the selected diversity measure among the remaining plots. We used  $\gamma$  diversity in Figure SA15 and effective  $\beta$  diversity in Figure SA16. This procedure was undertaken independently for each of the ten biodiversity measures.

The ten plots are ranked in Table SA11 by contribution to retained  $\gamma$  diversity and Table SA14 by contribution to retained effective  $\beta$  diversity. Rank 1 is the most important plot and was therefore removed last, Rank 10 is the least important plot and was removed first. The means and standard deviations of these ranks are calculated, respectively, in Table SA12 and Table SA15.

Table SA12 shows that, for retained  $\gamma$  diversity, Plots 4 and 5 are important for the eDNA datasets and Plot 9 is important for the traditional biodiversity datasets. Plot 8 is still the least important for all of the datasets. For the effective  $\beta$  diversity measure shown in Table SA14, Plot 1 is most important for all of the datasets, whereas Plot 10 is only important to the eDNA datasets. Plot 5 is the least important and Plot 2 is the second least important for all of the datasets.

The Spearman correlations of those ranks among datasets are calculated in Table SA13 and Table SA16.

In summary, the eDNA methods and traditional methods produce similar patterns of rank when measured by contribution to retained effective  $\beta$  diversity.

#### Author details

<sup>1</sup>Allan Wilson Centre, University of Auckland, Auckland, New Zealand. <sup>2</sup>Department of Computer Science, University of Auckland, Private Bag 92019, Auckland 1142, New Zealand. <sup>3</sup>School of Biological Sciences, University of Auckland, Private Bag 92019, Auckland 1142, New Zealand. <sup>4</sup>The Institute for Plant and Food Research, Private Bag 92169, Auckland 1142, New Zealand. <sup>5</sup>Landcare Research, Private Bag 92170, Auckland 1142, New Zealand. <sup>6</sup>South Australian Museum, North Terrace, Adelaide SA 5000, Australia. <sup>7</sup>School of Pharmacy and Medical Sciences, University of South Australia, GPO Box 2471, Adelaide SA 5001, Australia. <sup>8</sup>Department of Statistics, University of Auckland, Private Bag 92019, Auckland 1142, New Zealand. <sup>9</sup>Department of Biological Sciences, University of Waikato, Private Bag 3105, Hamilton 3240, New Zealand. <sup>10</sup>School of Biological Sciences, Victoria University of Wellington, PO Box 600, Wellington 6140, New Zealand.

#### References

1. Huson DH, Mitra S, Ruscheweyh HJ, Weber N, Schuster SC. Integrative analysis of environmental sequences using MEGAN4. *Genome research*. 2011;21(9):1552–1560.

**Figure SA1** The number of OTUs at the 97% clustering threshold across the number of sites.

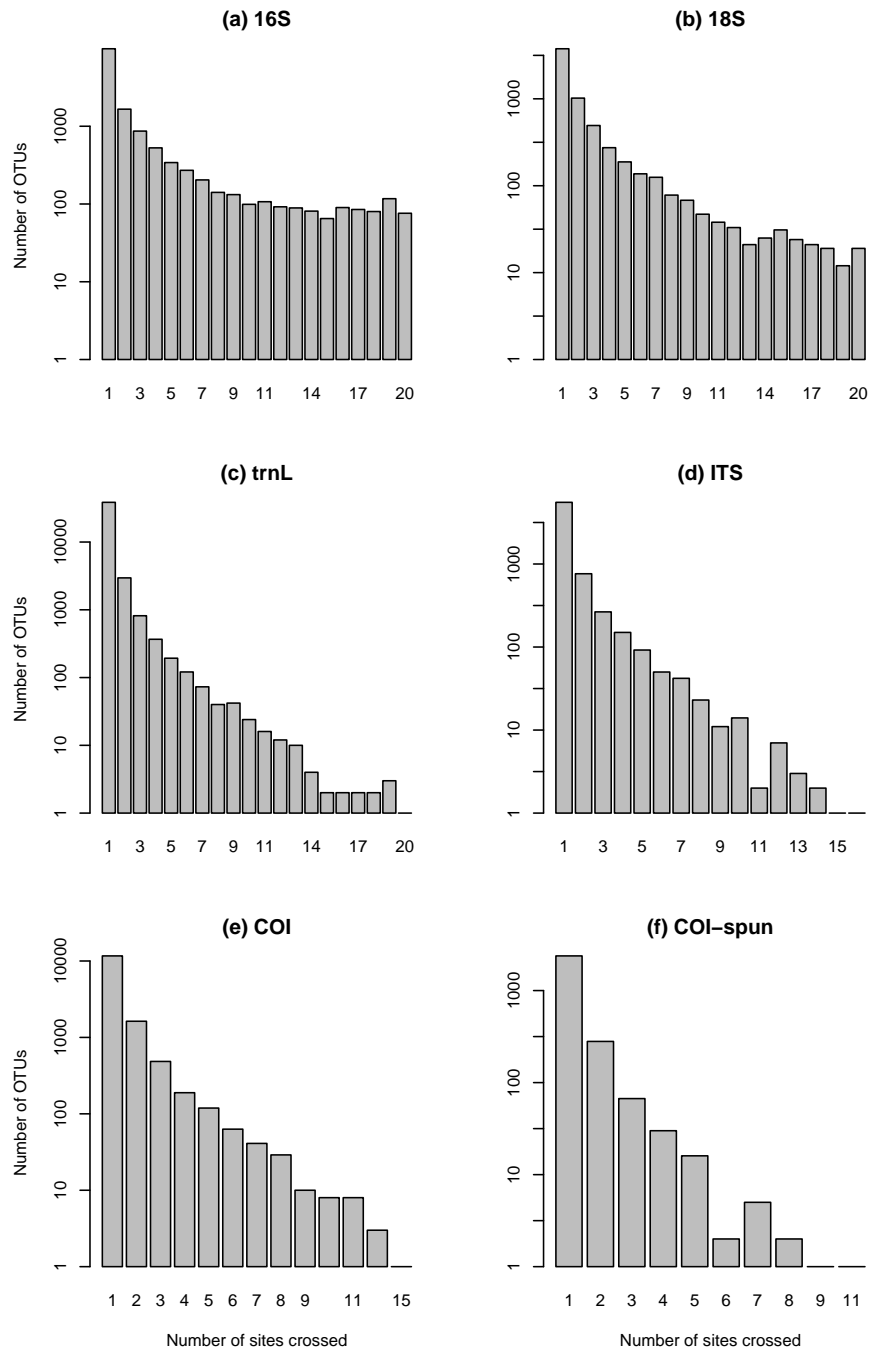

**Figure SA2** MEGAN taxonomic classification of OTUs at the 97% clustering threshold assigned to phyla and equivalent high-level taxa for 16S data's BLAST result.

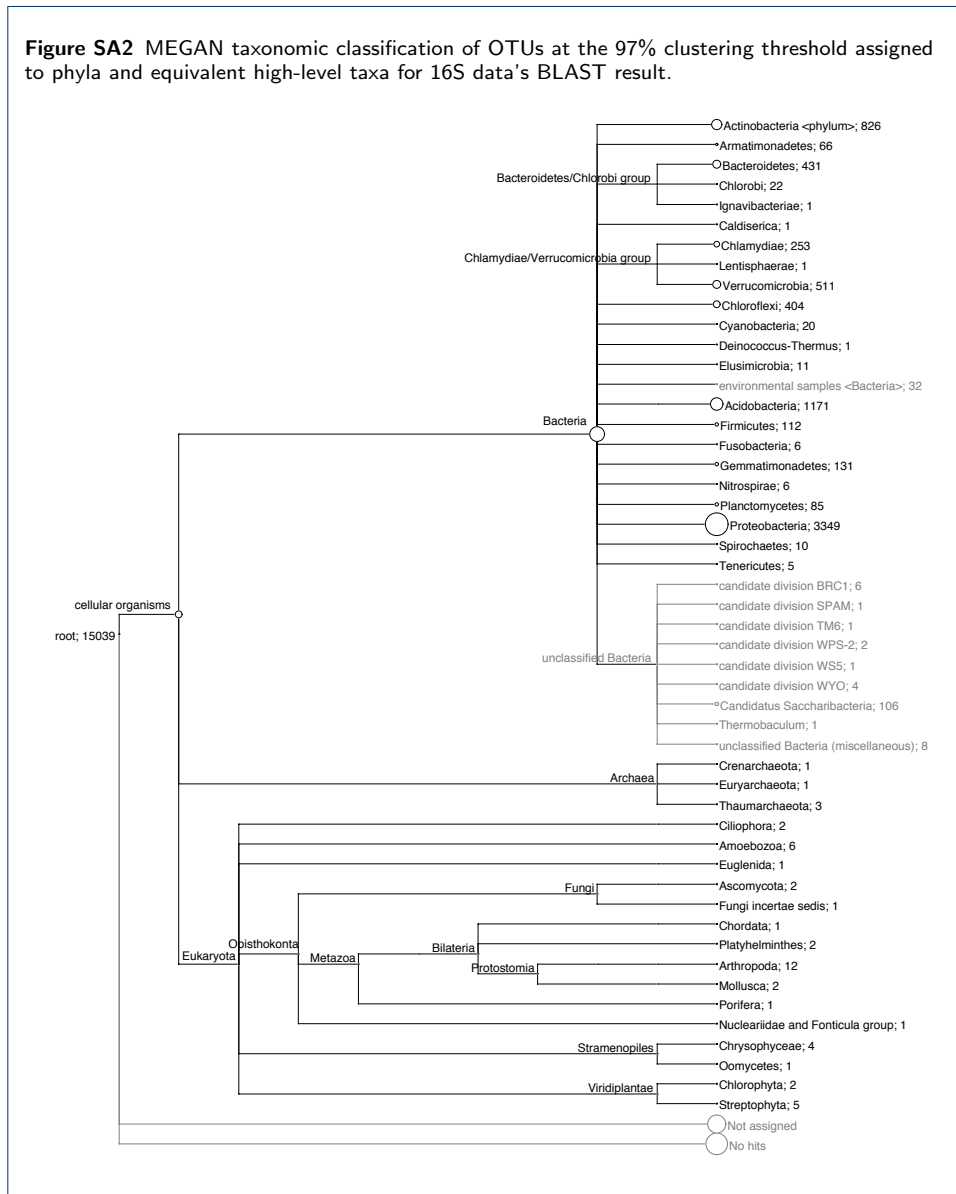

**Figure SA3** MEGAN taxonomic classification of OTUs at the 97% clustering threshold assigned to phyla and equivalent high-level taxa for 18S data's BLAST result.

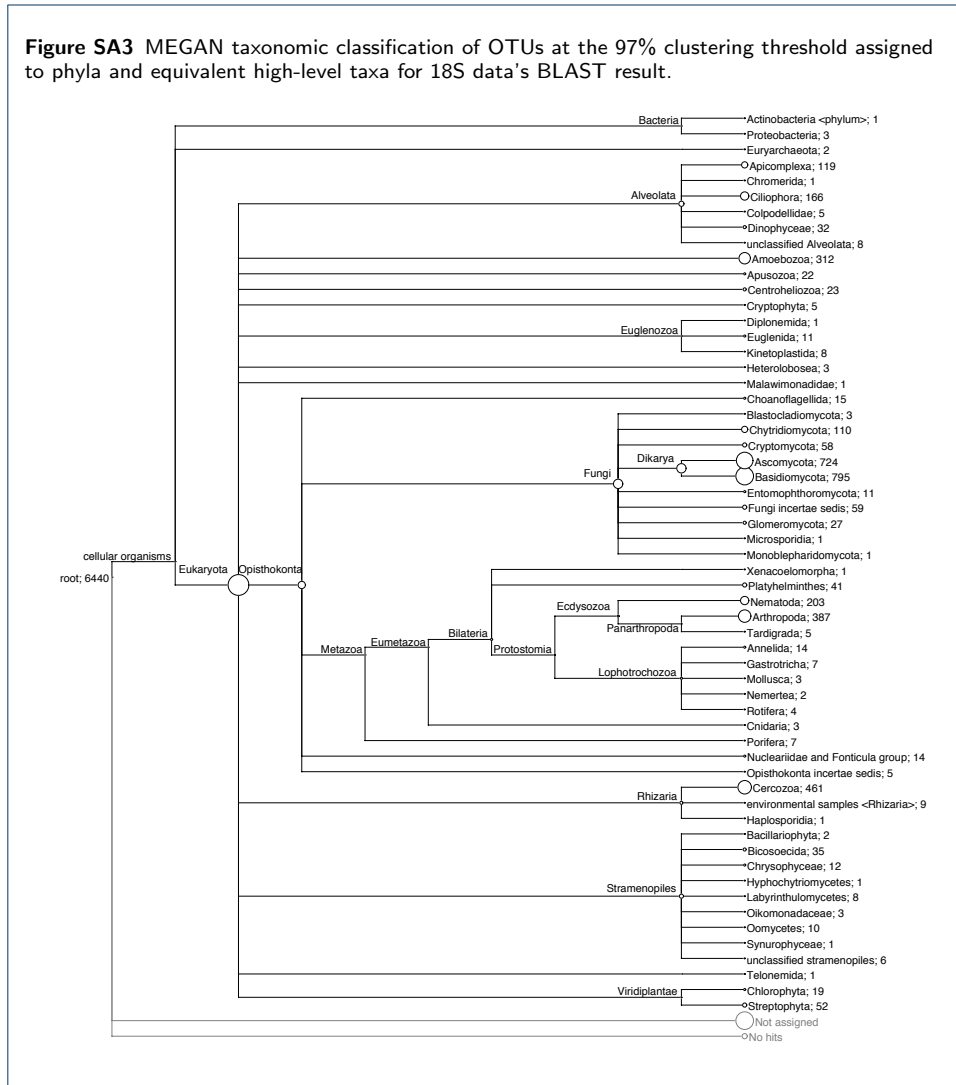

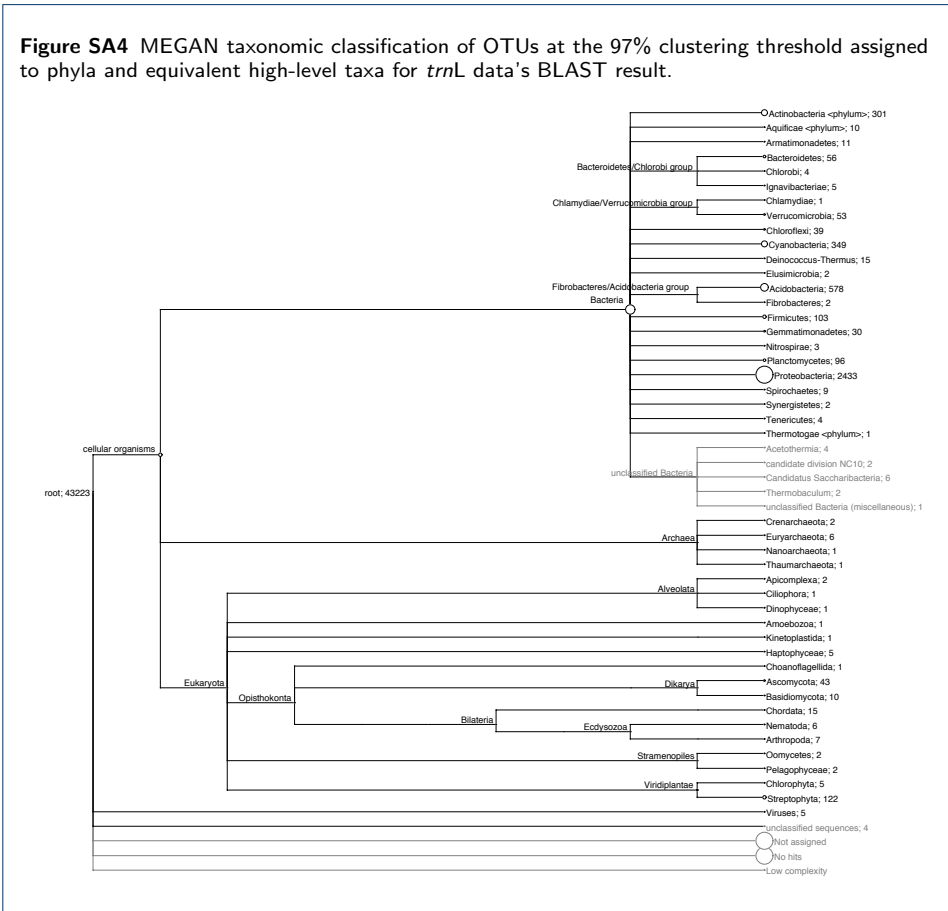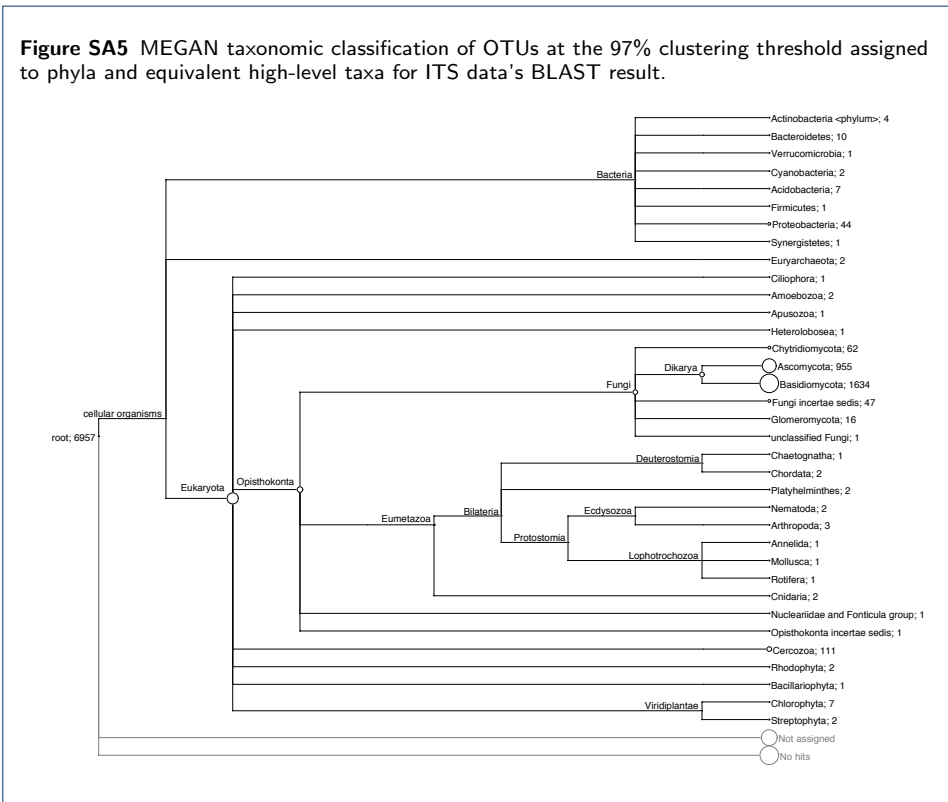

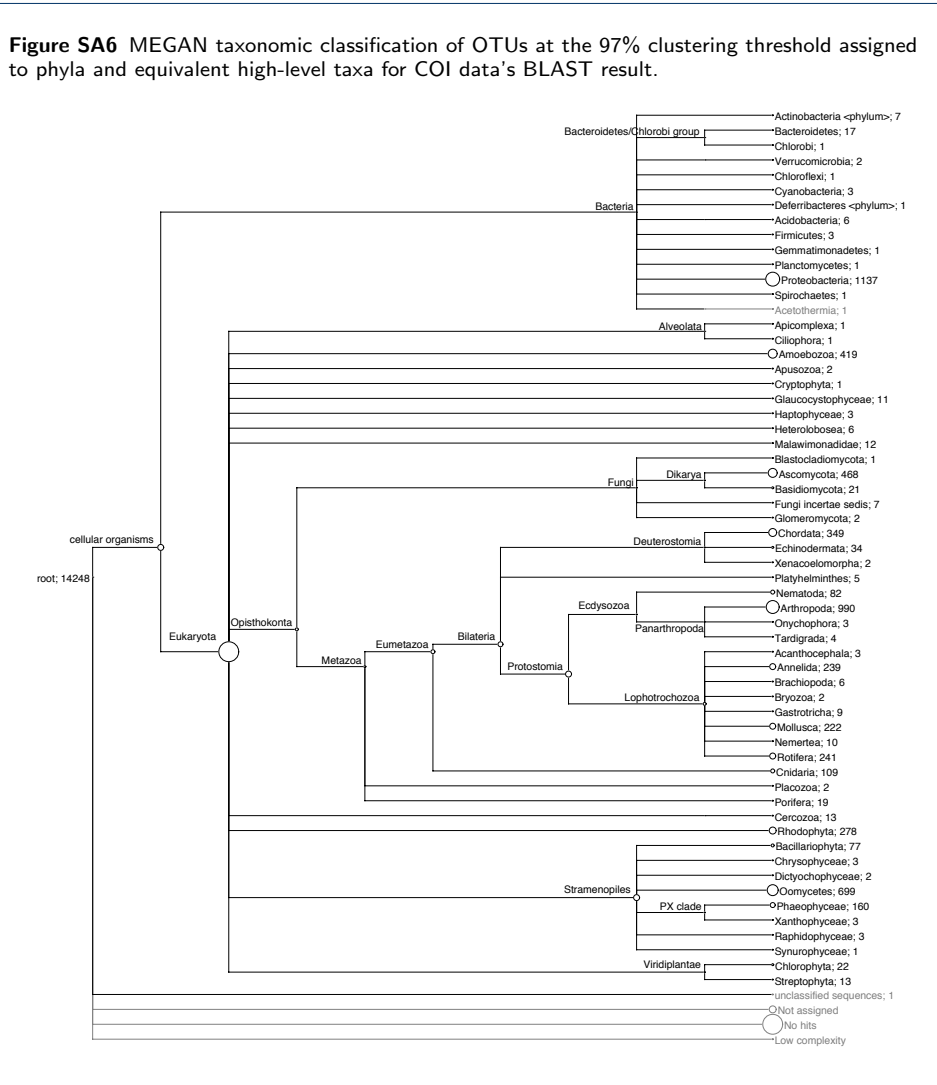

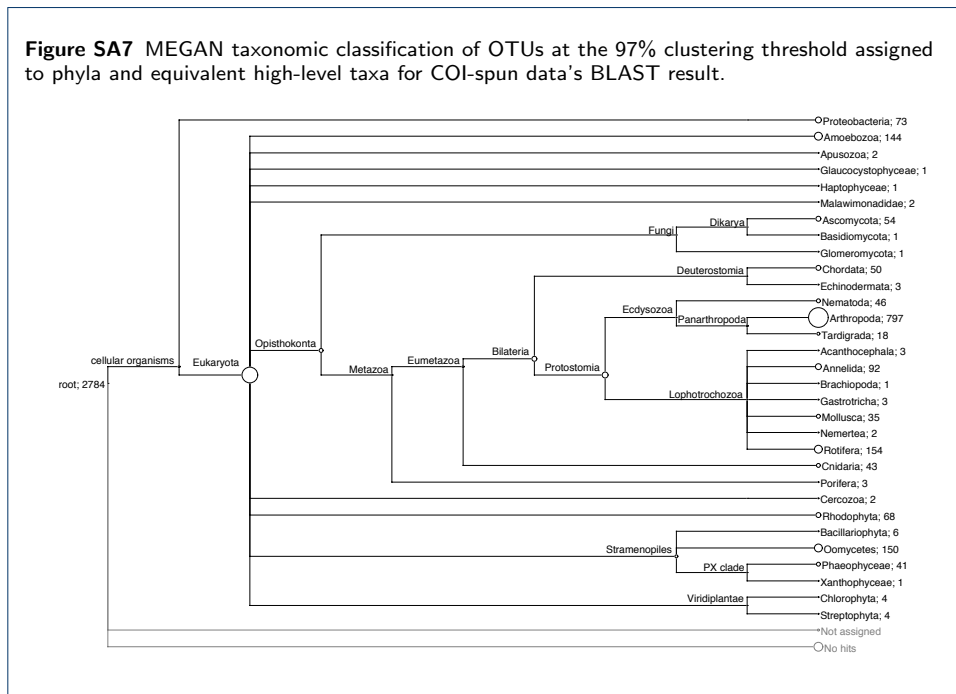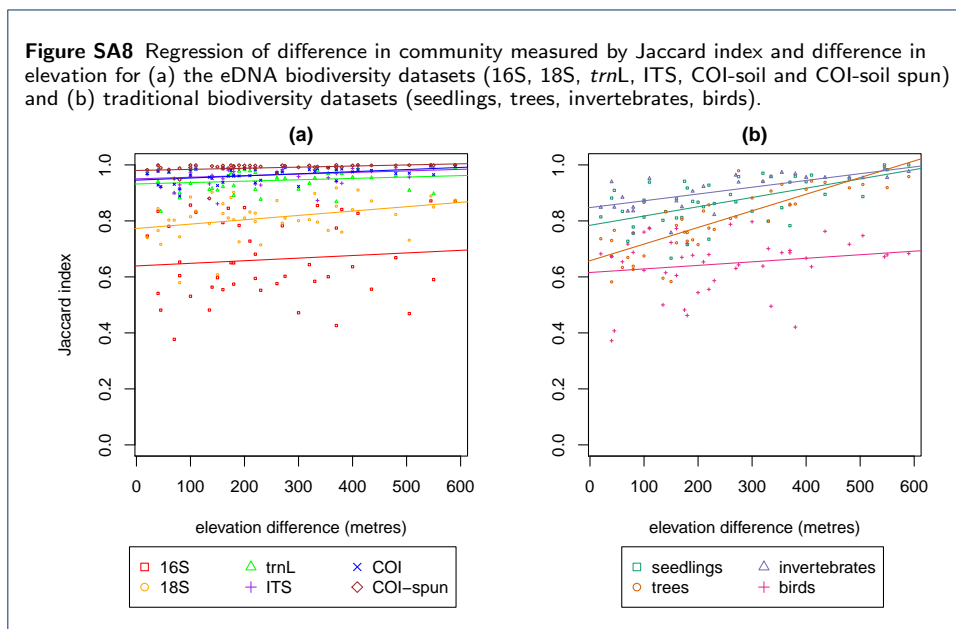



**Figure SA9** Regression of difference in community measured by Horn-Morisita overlap and difference in elevation for (a) the eDNA biodiversity datasets (16S, 18S, *trnL*, ITS, COI-soil and COI-soil spun) and (b) traditional biodiversity datasets (seedlings, trees, invertebrates, birds).

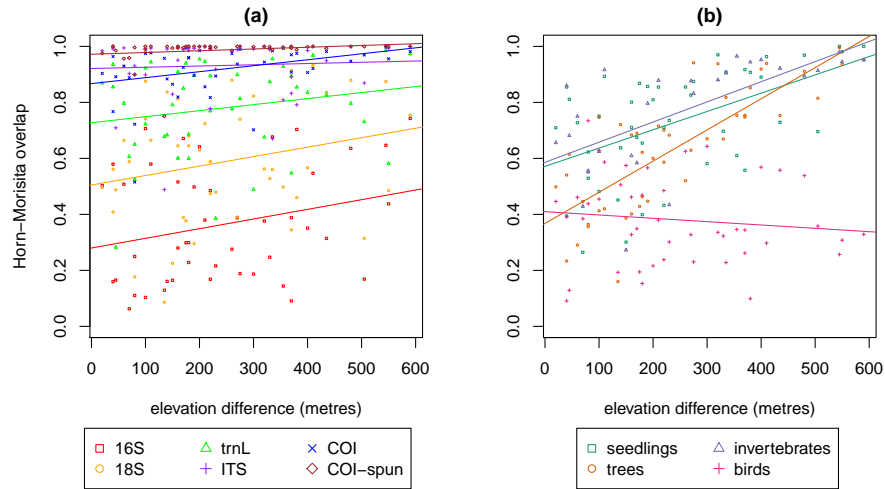

**Figure SA10** Regression of effective  $\alpha$  diversity as a function of elevation for (a) the eDNA biodiversity datasets (16S, 18S, *trnL*, ITS, COI-soil and COI-soil spun) and (b) traditional biodiversity datasets (seedlings, trees, invertebrates, birds).

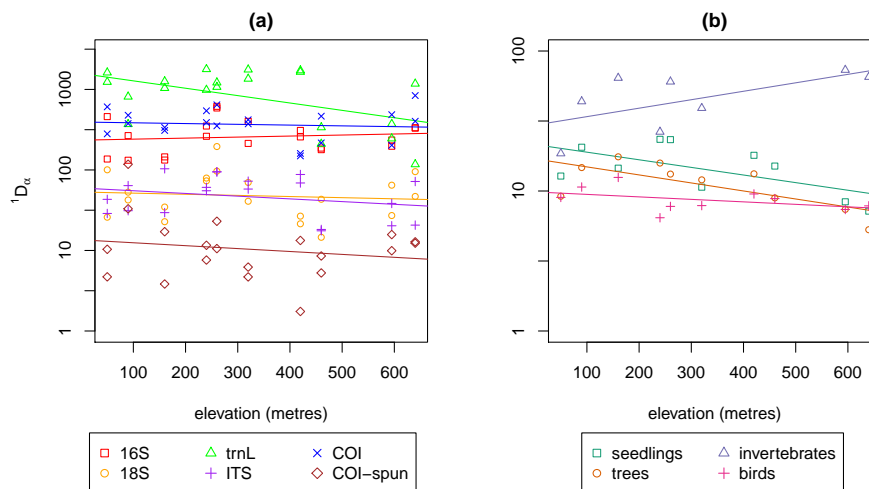

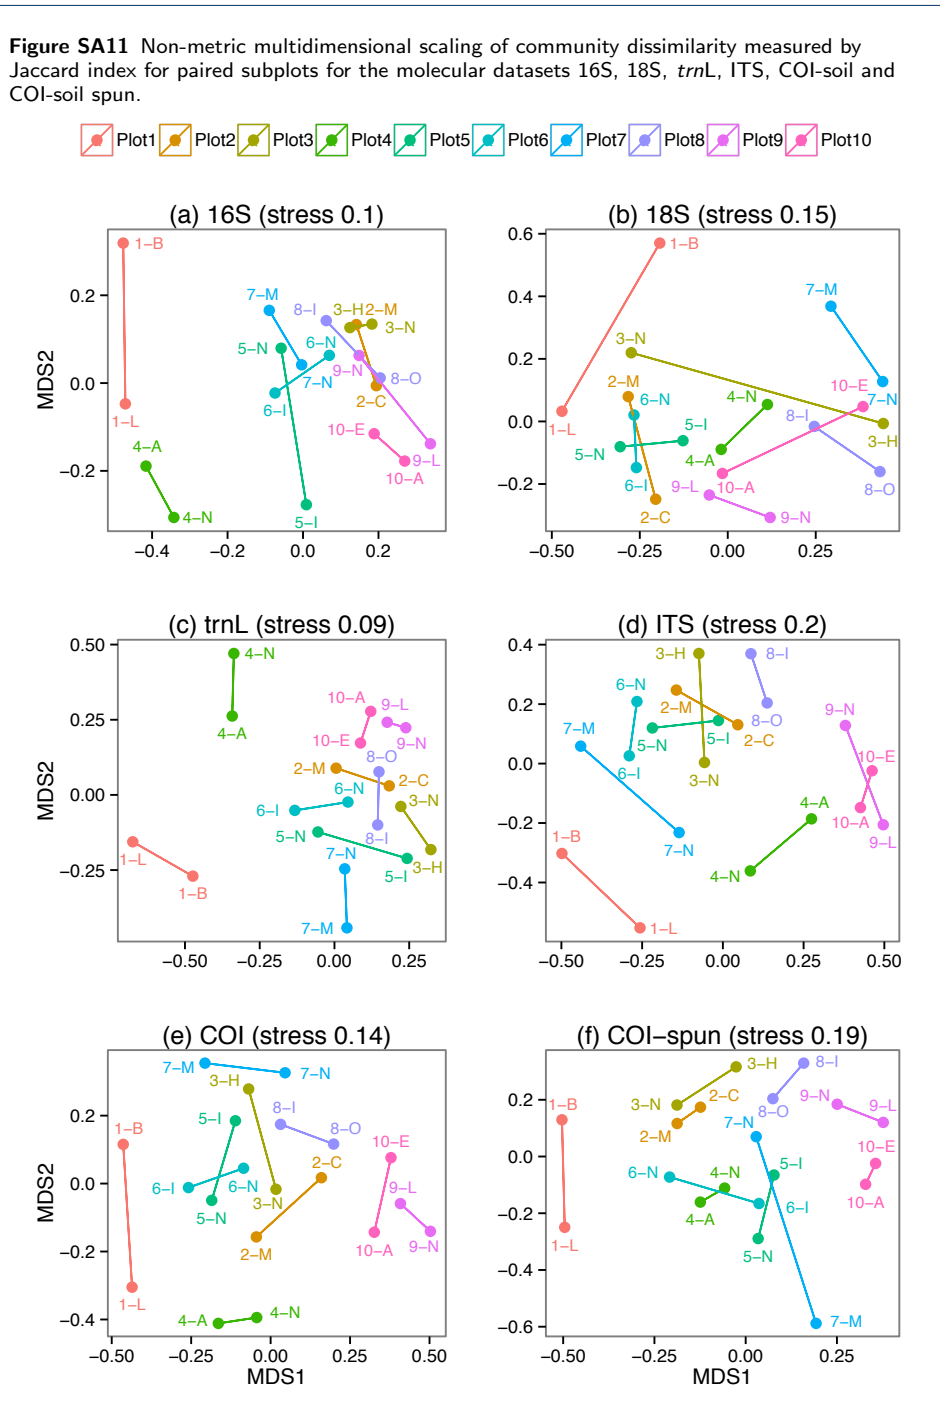

**Figure SA12** Non-metric multidimensional scaling of community dissimilarity measured by Horn-Morisita overlap for paired subplots for the molecular datasets 16S, 18S, *trnL*, ITS, COI-soil and COI-soil spun.

Plot1 Plot2 Plot3 Plot4 Plot5 Plot6 Plot7 Plot8 Plot9 Plot10

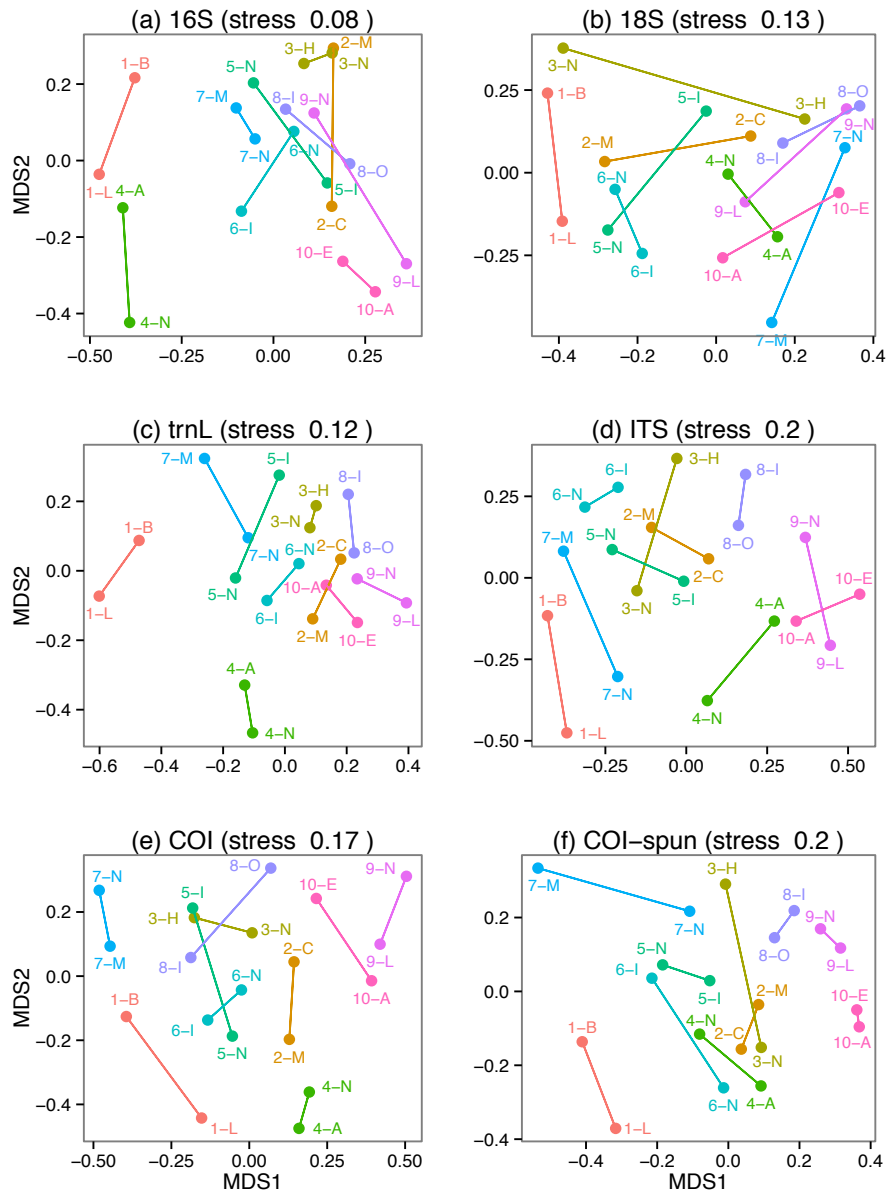

**Figure SA13** Multidimensional scaling of pairwise community matrix correlations of effective  $\beta$  diversity within and between the eDNA datasets (16S, 18S, trnL, ITS, COI-soil and COI-soil spun) and traditional datasets (seedlings, trees, invertebrates, birds).

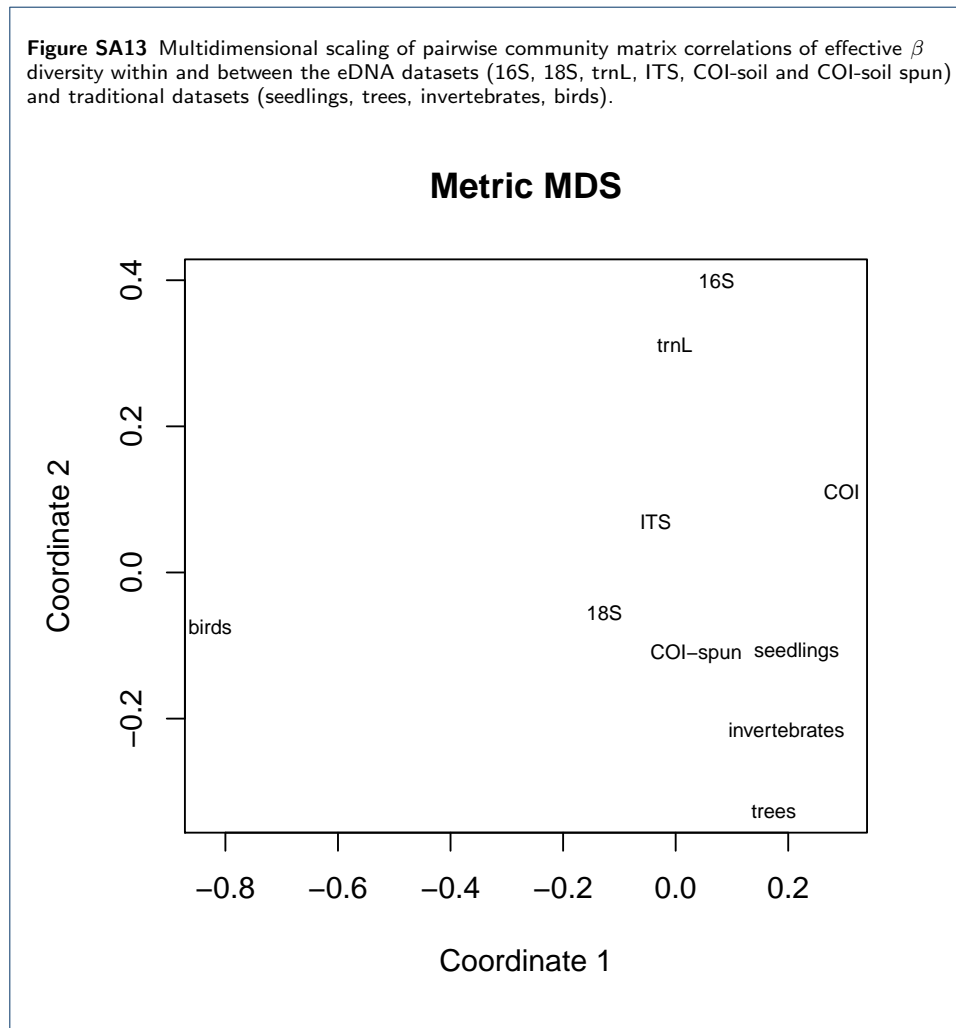

**Figure SA14** The probability of having a) maximum  $\gamma$  diversity and b) maximum effective  $\beta$  diversity of all possible combinations of four plots for the eDNA biodiversity datasets (16S, 18S, *trnL*, ITS, COI-soil and COI-soil spun) and the traditional biodiversity datasets (seedlings, trees, invertebrates, birds).

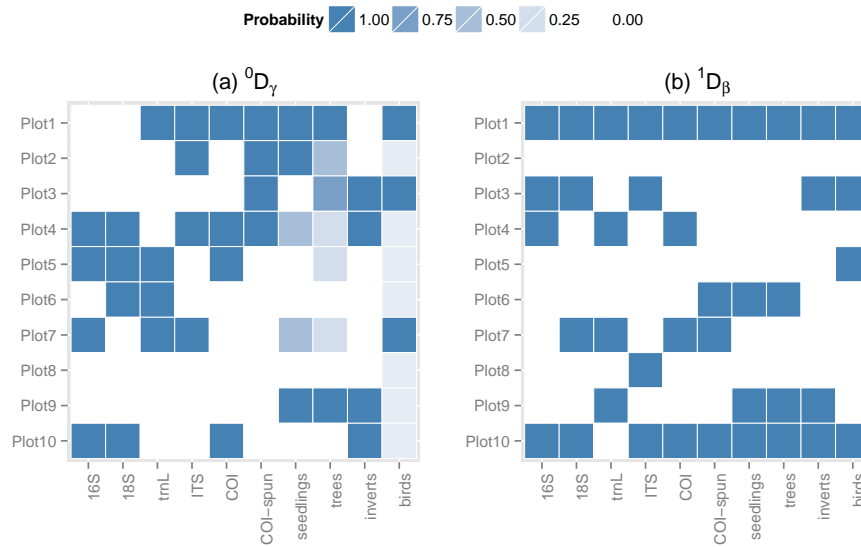

**Figure SA15** Maximum remained  $\gamma$  diversity as a function of number of sites for (a) eDNA biodiversity datasets (16S, 18S, *trnL*, ITS, COI-soil and COI-soil spun) and (b) traditional biodiversity datasets (seedlings, trees, invertebrates, birds). The plots were removed sequentially to minimize the loss of overall  $\gamma$  diversity among the remaining plots. This procedure was undertaken independently for each of the ten biodiversity measures.

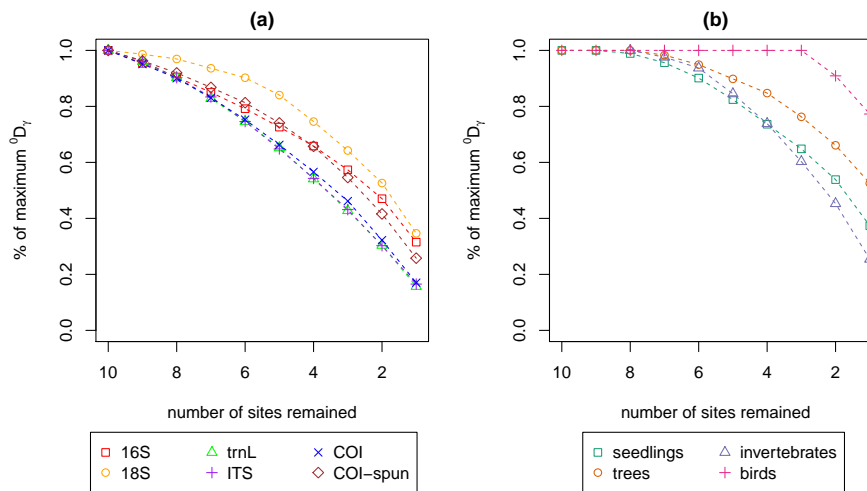

**Figure SA16** Maximum remained effective  $\beta$  diversity as a function of the number of sites for (a) eDNA biodiversity datasets (16S, 18S, *trnL*, ITS, COI-soil, and COI-soil spun) and (b) traditional biodiversity datasets (seedlings, trees, invertebrates, birds). The plots were removed sequentially to maximize the resulting effective  $\beta$  diversity among the remaining plots. This procedure was undertaken independently for each of the ten biodiversity measures.

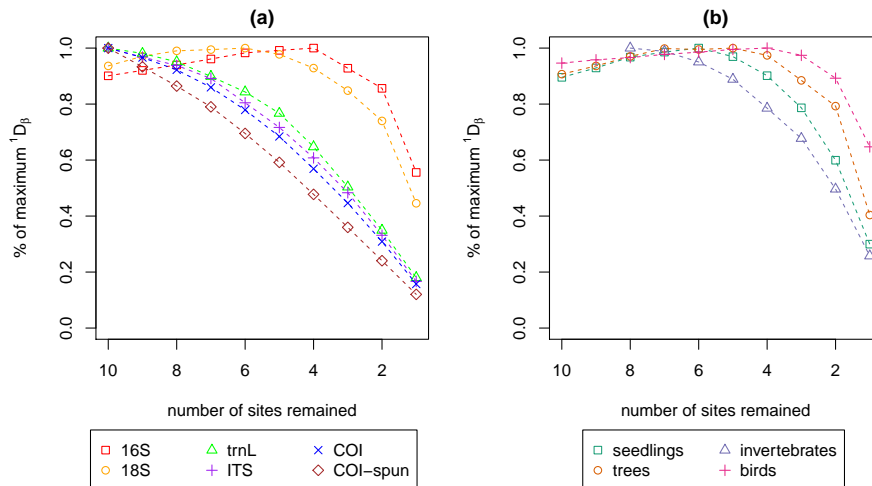

**Figure SA17** Environmental data. Correlation plots of the 15 environmental variables after logarithmic transform to soil chemistry measurements, except for the pH and Carbon-Nitrogen ratio.

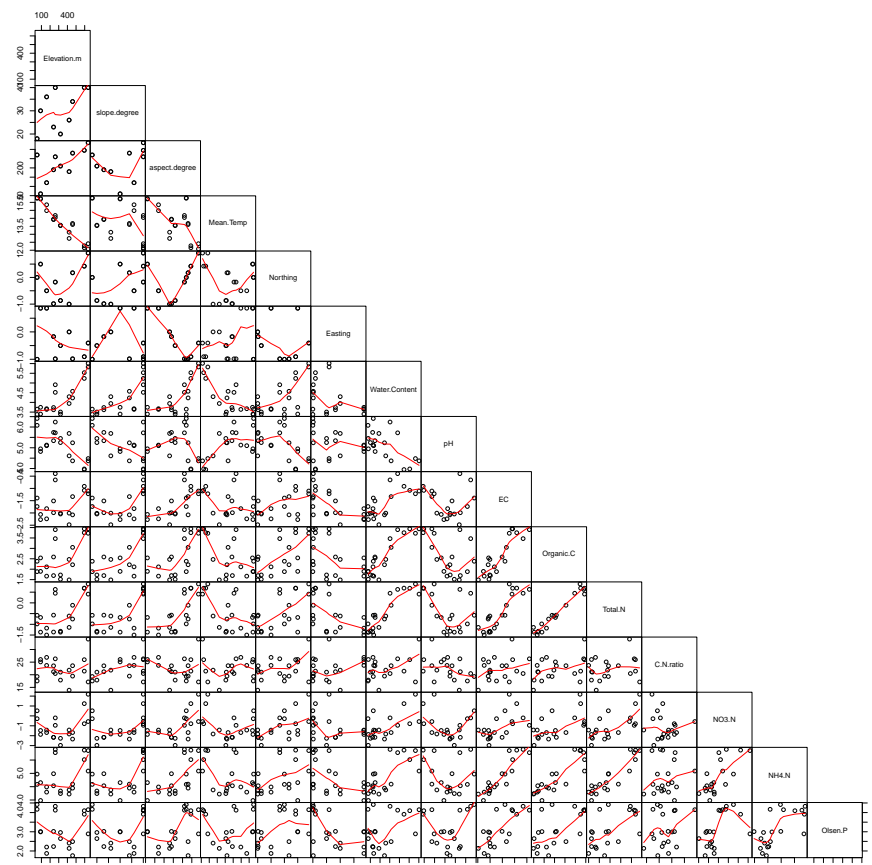

**Figure SA18** Models constructed by the combined set of variables with VIF < 10 using distance-based redundancy analysis for the molecular datasets 16S, 18S, *trnL*, ITS, COI, and COI-spun.

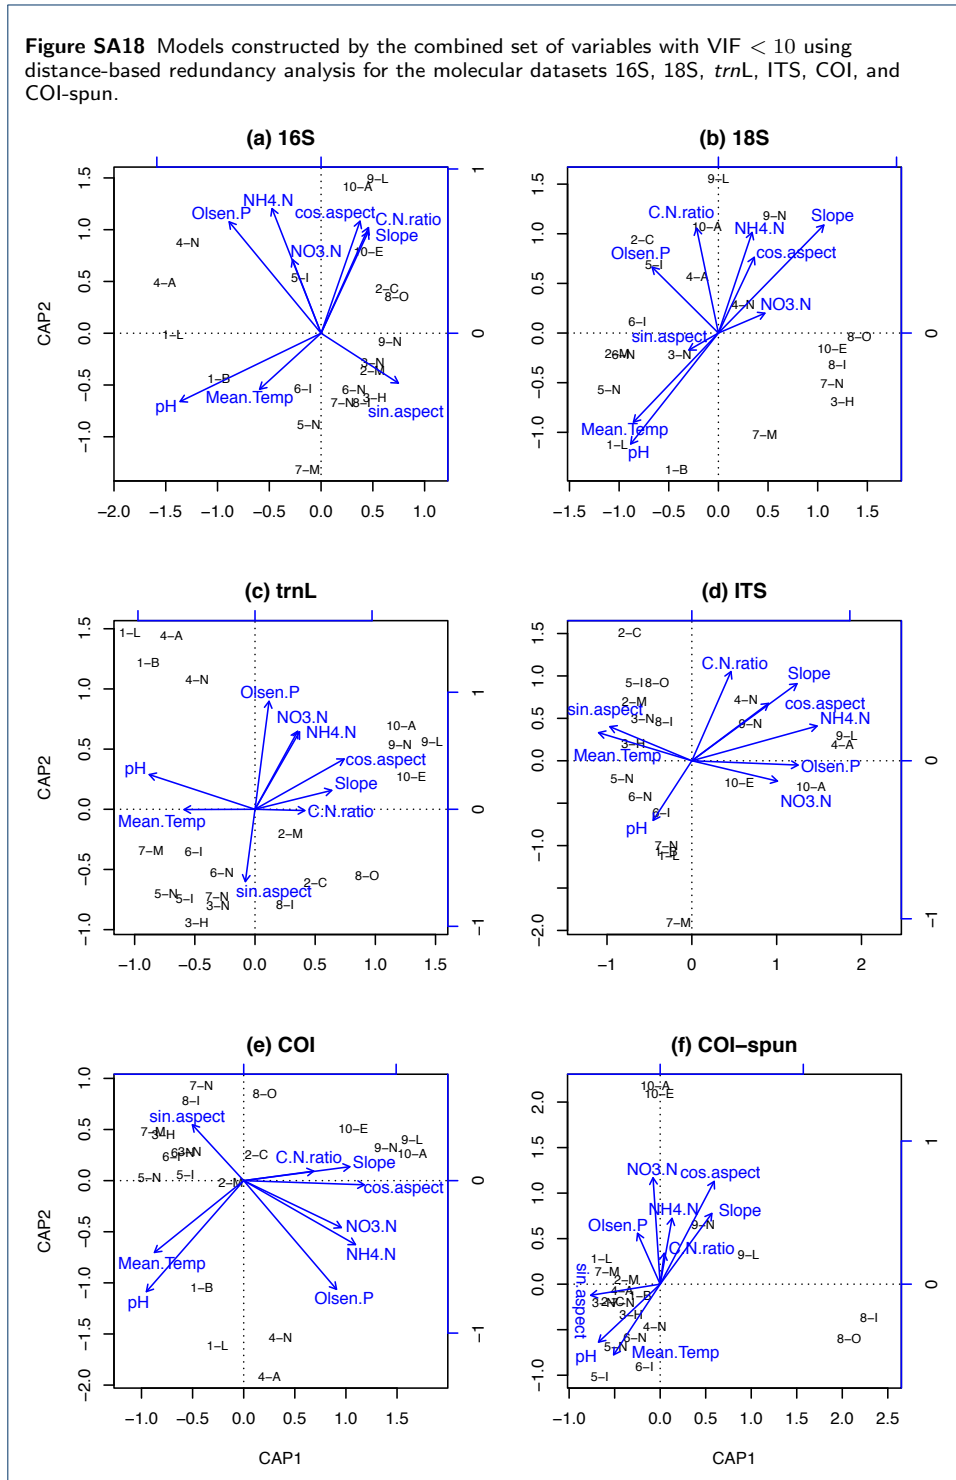

**Figure SA19** More conservative models constructed by the subsets of the variables with VIF < 10 chosen by stepwise selection model building procedures using distance-based redundancy analysis for the molecular datasets (16S, 18S, *trnL*, ITS, COI, and COI-spun).

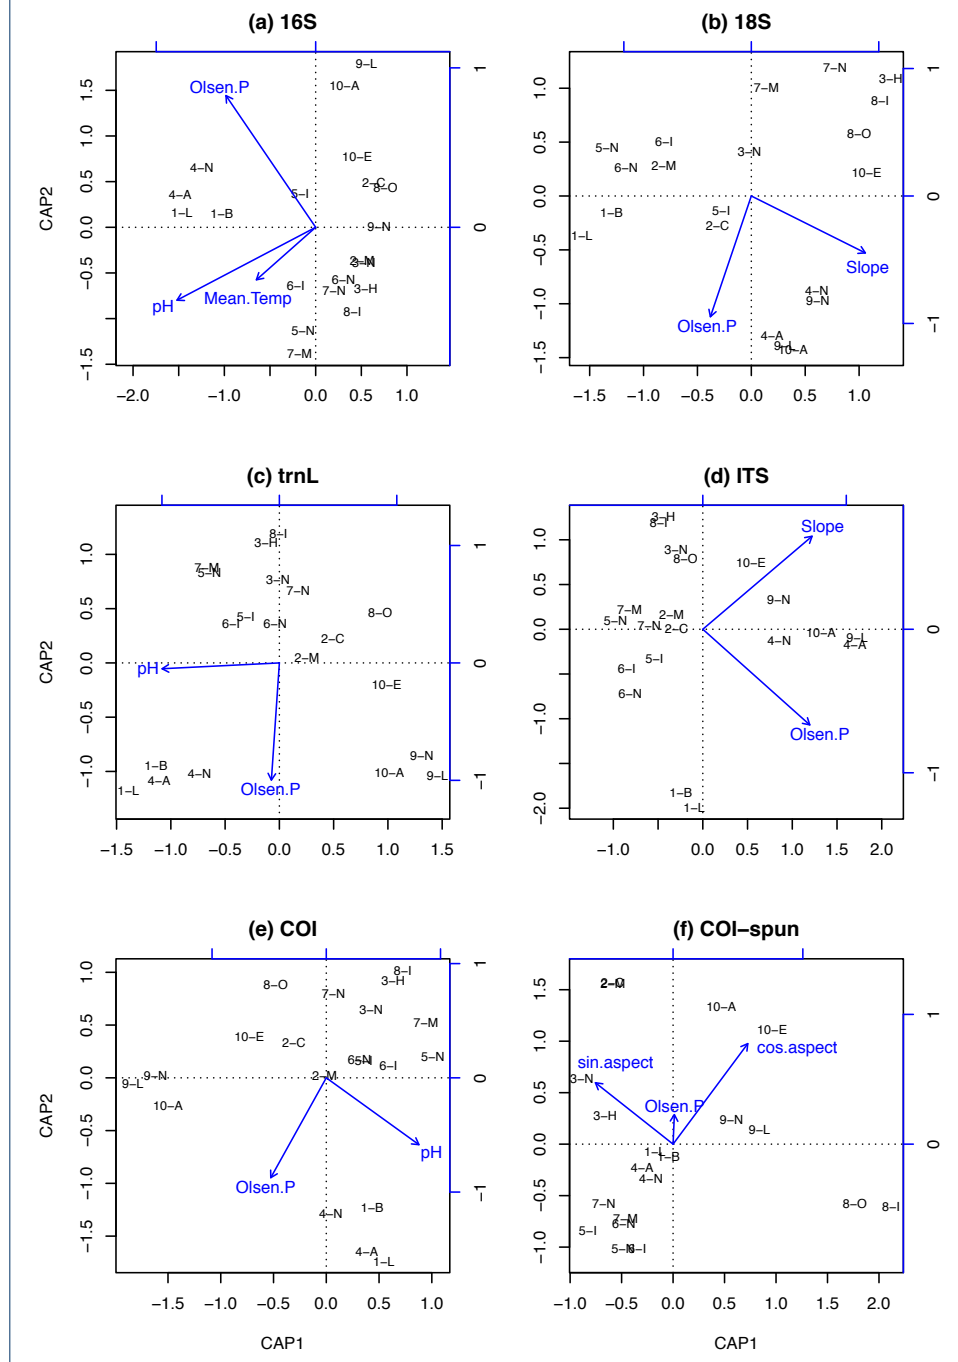



**Figure SA20** More conservative models constructed by the subsets of the variables with VIF < 10 chosen by stepwise backward selection model building procedures using distance-based redundancy analysis for the molecular datasets (16S, 18S, *trnL*, ITS, COI, and COI-spun).

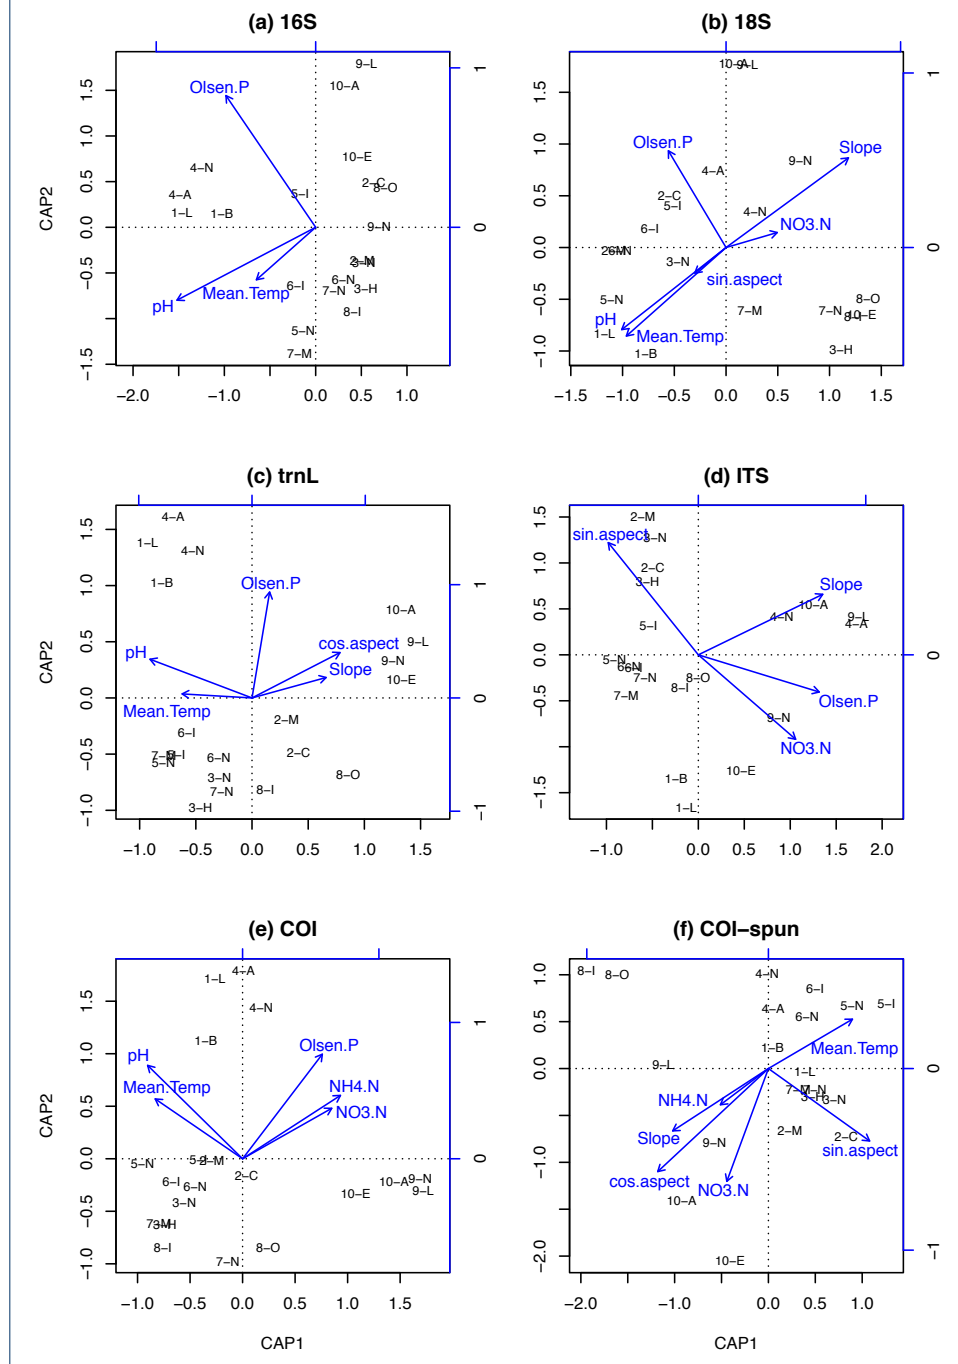

**Figure SA21** Models constructed by the combined set of variables with VIF < 10, and more conservative models chosen by stepwise forward or backward selection model building procedures using distance-based redundancy analysis for the plant datasets (seedlings and trees).

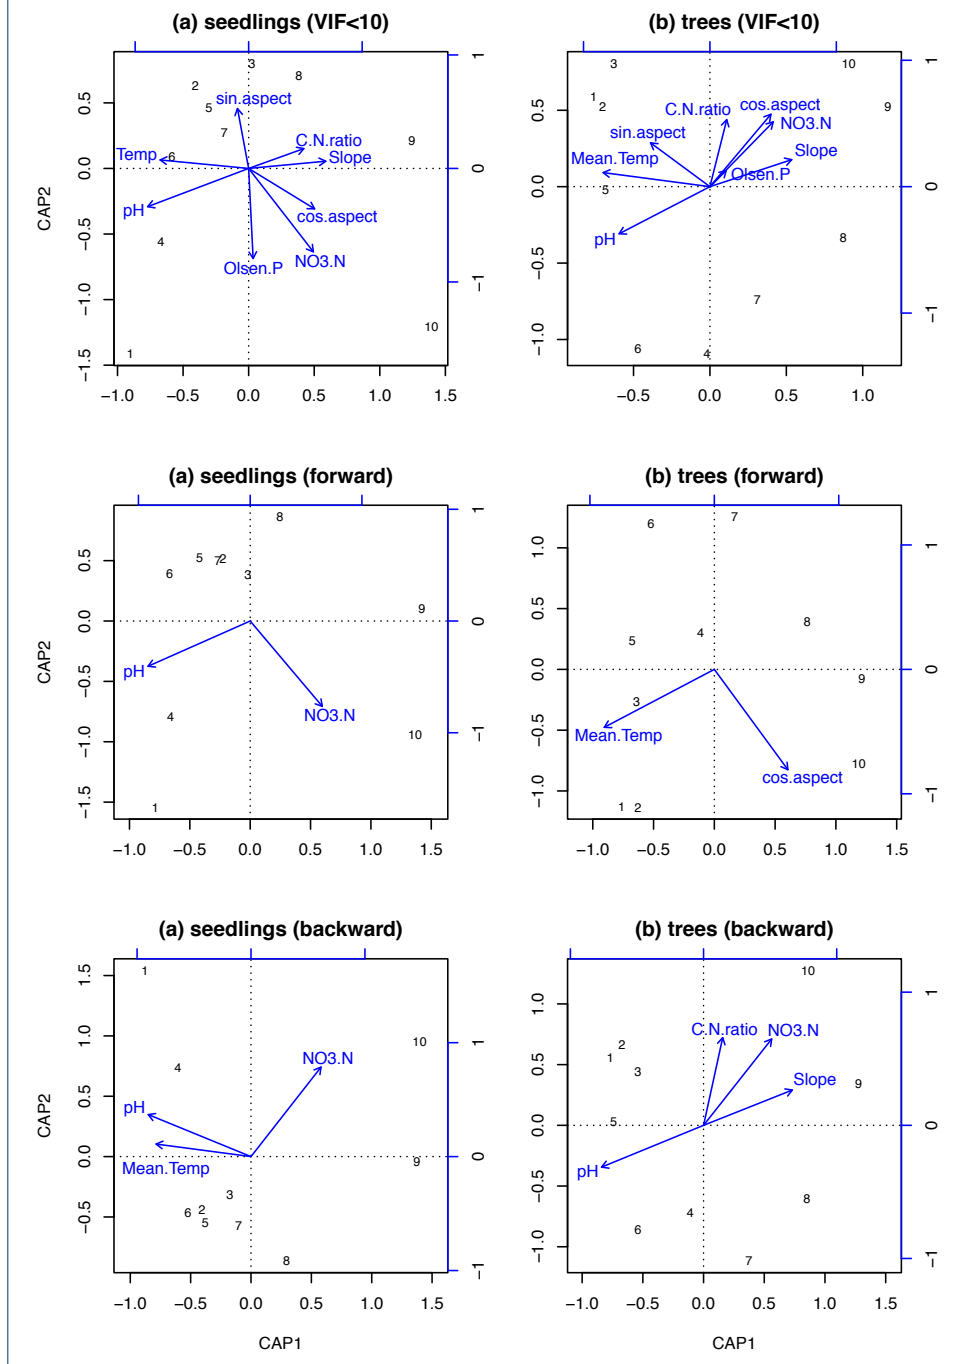

**Table SA1** Table of sequences per plot for 16S, 18S, *trnL*, ITS, COI, and COI-spun molecular datasets.

|        | 16S    | 18S     | <i>trnL</i> | ITS    | COI    | COI-spun | Total   |
|--------|--------|---------|-------------|--------|--------|----------|---------|
| Plot1  | 64,647 | 27,475  | 16,502      | 10,350 | 10,552 | 11,303   | 140,829 |
| Plot2  | 47,564 | 100,673 | 19,714      | 19,763 | 8,089  | 8,170    | 203,973 |
| Plot3  | 48,262 | 34,213  | 12,757      | 12,813 | 7,248  | 8,012    | 123,305 |
| Plot4  | 61,037 | 50,823  | 16,161      | 14,717 | 7,408  | 6,361    | 156,507 |
| Plot5  | 93,729 | 86,935  | 16,951      | 18,167 | 10,629 | 4,548    | 230,959 |
| Plot6  | 37,971 | 78,377  | 17,487      | 12,549 | 9,200  | 3,679    | 159,263 |
| Plot7  | 53,431 | 15,079  | 13,906      | 4,344  | 5,978  | 5,383    | 98,121  |
| Plot8  | 55,093 | 17,877  | 22,350      | 23,527 | 8,195  | 5,907    | 132,949 |
| Plot9  | 50,962 | 74,085  | 12,964      | 11,805 | 7,828  | 5,096    | 162,740 |
| Plot10 | 51,289 | 35,289  | 21,914      | 4,850  | 8,620  | 5,137    | 127,099 |

**Table SA2** Table of OTUs per plot for 16S, 18S, *trnL*, ITS, COI, and COI-spun molecular datasets.

|        | 16S   | 18S   | <i>trnL</i> | ITS   | COI   | COI-spun | Total* |
|--------|-------|-------|-------------|-------|-------|----------|--------|
| Plot1  | 2,781 | 1,189 | 6,552       | 1,007 | 2,344 | 344      | 14,217 |
| Plot2  | 2,619 | 1,460 | 4,462       | 1,039 | 1,776 | 718      | 12,074 |
| Plot3  | 2,437 | 963   | 5,166       | 994   | 1,801 | 464      | 11,825 |
| Plot4  | 4,739 | 2,015 | 5,183       | 1,150 | 1,823 | 480      | 15,390 |
| Plot5  | 4,281 | 2,233 | 6,105       | 1,118 | 2,426 | 212      | 16,375 |
| Plot6  | 2,873 | 1,841 | 6,785       | 1,041 | 1,735 | 167      | 14,442 |
| Plot7  | 2,946 | 568   | 5,632       | 964   | 1,050 | 153      | 11,313 |
| Plot8  | 2,679 | 705   | 3,554       | 831   | 1,653 | 290      | 9,712  |
| Plot9  | 2,577 | 1,188 | 2,297       | 534   | 1,145 | 198      | 7,939  |
| Plot10 | 3,153 | 1,375 | 3,878       | 672   | 2,113 | 228      | 11,419 |

\* the total number of OTUs is just each number for each dataset added together.

**Table SA3** Table of Shannon index per plot for 16S, 18S, *trnL*, ITS, COI, and COI-spun molecular datasets.

|        | 16S    | 18S    | <i>trnL</i> | ITS    | COI    | COI-spun |
|--------|--------|--------|-------------|--------|--------|----------|
| Plot1  | 276.24 | 103.38 | 2,379.34    | 61.61  | 768.13 | 12.61    |
| Plot2  | 211.25 | 58.98  | 889.48      | 71.21  | 779.77 | 111.20   |
| Plot3  | 155.16 | 43.39  | 1,890.03    | 107.57 | 518.60 | 16.16    |
| Plot4  | 663.09 | 196.26 | 1,967.64    | 164.57 | 813.71 | 29.98    |
| Plot5  | 370.61 | 104.45 | 2,355.96    | 98.43  | 881.03 | 15.87    |
| Plot6  | 345.75 | 73.23  | 2,605.78    | 104.56 | 677.12 | 10.23    |
| Plot7  | 315.69 | 33.06  | 2,822.58    | 138.23 | 240.27 | 6.07     |
| Plot8  | 206.70 | 33.85  | 414.90      | 22.01  | 586.96 | 8.40     |
| Plot9  | 263.84 | 57.80  | 440.73      | 51.53  | 496.35 | 20.70    |
| Plot10 | 379.72 | 102.08 | 526.29      | 64.55  | 959.68 | 19.79    |

**Table SA4** Table of all sampled individuals per plot for seedlings, tree, invertebrates, and birds.

|        | seedlings <sup>†</sup> | trees | inverts | birds | Total |
|--------|------------------------|-------|---------|-------|-------|
| Plot1  | 114                    | 405   | 56      | 110   | 685   |
| Plot2  | 198                    | 423   | 172     | 182   | 975   |
| Plot3  | 110                    | 257   | 159     | 90    | 616   |
| Plot4  | 194                    | 260   | 181     | 96    | 731   |
| Plot5  | 138                    | 291   | 130     | 99    | 658   |
| Plot6  | 66                     | 266   | 252     | 153   | 737   |
| Plot7  | 214                    | 521   | NA*     | 70    | 805   |
| Plot8  | 172                    | 453   | NA*     | 70    | 695   |
| Plot9  | 58                     | 373   | 213     | 56    | 700   |
| Plot10 | 38                     | 271   | 243     | 73    | 625   |

\* NA: invertebrate data is missing for Plots 7 and 8.

† These values correspond to presence-absence totals from the 24 seedling subplots (0.75m<sup>2</sup>), rather than the full plots.

**Table SA5** Table of species or OTUs per plot for seedlings, tree, invertebrates, and birds

|        | seedlings | trees | inverts | birds | Total <sup>†</sup> |
|--------|-----------|-------|---------|-------|--------------------|
| Plot1  | 22        | 21    | 28      | 15    | 86                 |
| Plot2  | 34        | 30    | 76      | 15    | 155                |
| Plot3  | 25        | 28    | 84      | 17    | 154                |
| Plot4  | 33        | 25    | 91      | 11    | 160                |
| Plot5  | 34        | 31    | 58      | 12    | 135                |
| Plot6  | 16        | 21    | 85      | 13    | 135                |
| Plot7  | 31        | 23    | NA*     | 13    | 67                 |
| Plot8  | 26        | 23    | NA*     | 10    | 59                 |
| Plot9  | 15        | 17    | 105     | 9     | 146                |
| Plot10 | 10        | 17    | 99      | 10    | 136                |

\* NA: invertebrate data is missing for Plots 7 and 8.

† The total number of OTUs is just each number for each dataset added together.

**Table SA6** Table of Shannon index per plot for seedlings, tree, invertebrates, and birds

|        | seedlings | trees | inverts | birds |
|--------|-----------|-------|---------|-------|
| Plot1  | 12.79     | 9.18  | 18.54   | 9.00  |
| Plot2  | 20.55     | 14.71 | 43.63   | 10.68 |
| Plot3  | 14.56     | 17.55 | 64.21   | 12.51 |
| Plot4  | 23.28     | 13.21 | 60.36   | 7.76  |
| Plot5  | 23.39     | 15.84 | 26.45   | 6.44  |
| Plot6  | 10.65     | 12.01 | 39.09   | 7.86  |
| Plot7  | 17.99     | 13.27 | NA*     | 9.53  |
| Plot8  | 15.07     | 8.93  | NA*     | 8.82  |
| Plot9  | 8.37      | 7.39  | 73.20   | 7.38  |
| Plot10 | 7.18      | 5.29  | 65.19   | 7.83  |

\* NA: invertebrate data is missing for Plots 7 and 8.

**Table SA7** Mantel statistic  $r$  and their significance using Mantel's test based on 4,999 permutations, and  $R^2$  and  $p$ -value for a linear model of the regression of difference in community measured by Jaccard and difference in elevation in Figure SA8.

|               | Mantel statistic $r$ | significance | $R^2$  | $p$ -value |
|---------------|----------------------|--------------|--------|------------|
| 16S           | 0.103                | 0.285        | 0.0106 | 0.500      |
| 18S           | 0.33                 | 0.0192       | 0.109  | 0.0267     |
| trnL          | 0.191                | 0.1422       | 0.0364 | 0.209      |
| ITS           | 0.262                | 0.0592       | 0.0686 | 0.0821     |
| COI           | 0.464                | 0.0036       | 0.215  | 0.00132    |
| COI-spun      | 0.302                | 0.0108       | 0.0911 | 0.0439     |
| seedlings     | 0.592                | 8e-04        | 0.351  | 1.82e-05   |
| trees         | 0.805                | 2e-04        | 0.648  | 2.68e-11   |
| invertebrates | 0.711                | 0.006        | 0.505  | 2.26e-05   |
| birds         | 0.186                | 0.1482       | 0.0346 | 0.221      |

**Table SA8** Mantel statistic  $r$  and their significance using Mantel's test based on 4,999 permutations, and  $R^2$  and  $p$ -value for a linear model of the regression of difference in community measured by Horn-Morisita and difference in elevation in Figure SA9.

|               | Mantel statistic $r$ | significance | $R^2$   | $p$ -value |
|---------------|----------------------|--------------|---------|------------|
| 16S           | 0.259                | 0.0796       | 0.0671  | 0.0858     |
| 18S           | 0.247                | 0.0726       | 0.0609  | 0.102      |
| trnL          | 0.196                | 0.1256       | 0.0384  | 0.197      |
| ITS           | 0.063                | 0.3598       | 0.00400 | 0.680      |
| COI           | 0.345                | 0.013        | 0.119   | 0.0201     |
| COI-spun      | 0.24                 | 0.0378       | 0.0577  | 0.112      |
| seedlings     | 0.516                | 0.001        | 0.266   | 2.87e-04   |
| trees         | 0.793                | 2e-04        | 0.629   | 8.26e-11   |
| invertebrates | 0.652                | 0.0112       | 0.425   | 1.7e-04    |
| birds         | -0.116               | 0.7134       | 0.0134  | 0.449      |

**Table SA9** The significance test of effective  $\alpha$  diversity as a function of elevation in Figure SA10.

|               | $R^2$   | $p$ -value |
|---------------|---------|------------|
| 16S           | 0.0151  | 0.606      |
| 18S           | 0.00967 | 0.680      |
| trnL          | 0.255   | 0.0230     |
| ITS           | 0.0668  | 0.271      |
| COI           | 0.00919 | 0.688      |
| COI-spun      | 0.0347  | 0.432      |
| seedlings     | 0.379   | 0.0582     |
| trees         | 0.501   | 0.0219     |
| invertebrates | 0.386   | 0.100      |
| birds         | 0.185   | 0.215      |

**Table SA10** Pairwise community matrix Procrustes analysis of effective  $\beta$  diversity within and between the eDNA datasets and traditional datasets, estimated as sum of the squared differences and their significance in parentheses is based on 4,999 permutations.

|           | 16S               | 18S              | trnL              | ITS              | COI              | COI-spun        | seedlings        | trees           | inverts        |
|-----------|-------------------|------------------|-------------------|------------------|------------------|-----------------|------------------|-----------------|----------------|
| 18S       | 0.57<br>(0.021)   |                  |                   |                  |                  |                 |                  |                 |                |
| trnL      | 0.35<br>(0.00060) | 0.55<br>(0.017)  |                   |                  |                  |                 |                  |                 |                |
| ITS       | 0.59<br>(0.019)   | 0.65<br>(0.069)  | 0.34<br>(0.0016)  |                  |                  |                 |                  |                 |                |
| COI       | 0.44<br>(0.0014)  | 0.47<br>(0.0028) | 0.12<br>(0.00040) | 0.47<br>(0.010)  |                  |                 |                  |                 |                |
| COI-spun  | 0.82<br>(0.37)    | 0.70<br>(0.11)   | 0.85<br>(0.52)    | 0.78<br>(0.27)   | 0.78<br>(0.27)   |                 |                  |                 |                |
| seedlings | 0.49<br>(0.011)   | 0.41<br>(0.0016) | 0.50<br>(0.0068)  | 0.47<br>(0.0056) | 0.44<br>(0.0038) | 0.81<br>(0.37)  |                  |                 |                |
| trees     | 0.63<br>(0.046)   | 0.45<br>(0.0018) | 0.69<br>(0.096)   | 0.72<br>(0.13)   | 0.61<br>(0.039)  | 0.53<br>(0.016) | 0.42<br>(0.0020) |                 |                |
| inverts   | 0.68<br>(0.14)    | 0.41<br>(0.012)  | 0.33<br>(0.010)   | 0.36<br>(0.0070) | 0.26<br>(0.0052) | 0.70<br>(0.22)  | 0.28<br>(0.0014) | 0.54<br>(0.052) |                |
| birds     | 0.88<br>(0.54)    | 0.56<br>(0.016)  | 0.87<br>(0.56)    | 0.85<br>(0.48)   | 0.83<br>(0.41)   | 0.66<br>(0.063) | 0.75<br>(0.19)   | 0.67<br>(0.058) | 0.63<br>(0.13) |

**Table SA11** Ranking sampling plots by removing plots sequentially so as to minimize the loss of overall  $\gamma$  diversity among the remaining plots from Figure SA15. 1 is the most important and is removed last, 10 is the least important and is removed at the beginning.

| Plot name | 16S | 18S | <i>trnL</i> | ITS | COI | COI-spun | seedlings | trees | inverts | birds |
|-----------|-----|-----|-------------|-----|-----|----------|-----------|-------|---------|-------|
| Plot1     | 6   | 8   | 2           | 3   | 2   | 4        | 5         | 4     | 8       | 2     |
| Plot2     | 8   | 5   | 8           | 2   | 8   | 1        | 6         | 3     | 6       | 10    |
| Plot3     | 10  | 7   | 6           | 6   | 5   | 3        | 4         | 7     | 4       | 1     |
| Plot4     | 1   | 2   | 5           | 1   | 4   | 2        | 2         | 6     | 2       | 9     |
| Plot5     | 2   | 1   | 3           | 7   | 1   | 8        | 1         | 1     | 7       | 8     |
| Plot6     | 7   | 3   | 1           | 5   | 6   | 10       | 10        | 10    | 5       | 7     |
| Plot7     | 4   | 9   | 4           | 4   | 9   | 9        | 8         | 5     | NA*     | 3     |
| Plot8     | 5   | 10  | 9           | 8   | 7   | 5        | 7         | 9     | NA*     | 6     |
| Plot9     | 9   | 6   | 10          | 10  | 10  | 7        | 3         | 2     | 1       | 5     |
| Plot10    | 3   | 4   | 7           | 9   | 3   | 6        | 9         | 8     | 3       | 4     |

\* NA: invertebrate data is missing for Plots 7 and 8.

**Table SA12** Means and standard deviations of Table SA11 between eDNA datasets for ranking plots to minimize the loss of overall  $\gamma$  diversity among the remaining plots.

|        | eDNA       | Traditional | Traditional No Birds | All        | All No Birds |
|--------|------------|-------------|----------------------|------------|--------------|
| Plot1  | 4.2 ± 2.40 | 4.8 ± 2.50  | 5.7 ± 2.08           | 4.4 ± 2.32 | 4.7 ± 2.29   |
| Plot2  | 5.3 ± 3.20 | 6.2 ± 2.87  | 5.0 ± 1.73           | 5.7 ± 2.95 | 5.2 ± 2.68   |
| Plot3  | 6.2 ± 2.32 | 4.0 ± 2.45  | 5.0 ± 1.73           | 5.3 ± 2.50 | 5.8 ± 2.11   |
| Plot4  | 2.5 ± 1.64 | 4.8 ± 3.40  | 3.3 ± 2.31           | 3.4 ± 2.59 | 2.8 ± 1.79   |
| Plot5  | 3.7 ± 3.08 | 4.2 ± 3.77  | 3.0 ± 3.46           | 3.9 ± 3.18 | 3.4 ± 3.00   |
| Plot6  | 5.3 ± 3.14 | 8.0 ± 2.45  | 8.3 ± 2.89           | 6.4 ± 3.06 | 6.3 ± 3.24   |
| Plot7  | 6.5 ± 2.74 | 5.3 ± 2.52  | 6.5 ± 2.12           | 6.1 ± 2.57 | 6.5 ± 2.45   |
| Plot8  | 7.3 ± 2.07 | 7.3 ± 1.53  | 8.0 ± 1.41           | 7.3 ± 1.80 | 7.5 ± 1.85   |
| Plot9  | 8.7 ± 1.75 | 2.8 ± 1.71  | 2.0 ± 1.00           | 6.3 ± 3.47 | 6.4 ± 3.64   |
| Plot10 | 5.3 ± 2.42 | 6.0 ± 2.94  | 6.7 ± 3.21           | 5.6 ± 2.50 | 5.8 ± 2.59   |

**Table SA13** Spearman correlations and their significance in parentheses of Table SA11 between eDNA datasets for ranking plots to minimize the loss of overall  $\gamma$  diversity among the remaining plots.

|             | 16S             | 18S              | <i>trnL</i>     | ITS             | COI             | COI-spun        | seedlings       | trees           | inverts | birds   |
|-------------|-----------------|------------------|-----------------|-----------------|-----------------|-----------------|-----------------|-----------------|---------|---------|
| 18S         | 0.39<br>(0.26)  |                  |                 |                 |                 |                 |                 |                 |         |         |
| <i>trnL</i> | 0.28<br>(0.43)  | 0.31<br>(0.39)   |                 |                 |                 |                 |                 |                 |         |         |
| ITS         | 0.18<br>(0.63)  | 0.12<br>(0.76)   | 0.45<br>(0.19)  |                 |                 |                 |                 |                 |         |         |
| COI         | 0.50<br>(0.14)  | 0.47<br>(0.18)   | 0.54<br>(0.11)  | 0.12<br>(0.76)  |                 |                 |                 |                 |         |         |
| COI-spun    | -0.13<br>(0.73) | -0.067<br>(0.86) | -0.38<br>(0.28) | 0.45<br>(0.19)  | 0.10<br>(0.79)  |                 |                 |                 |         |         |
| seedlings   | 0.13<br>(0.73)  | 0.32<br>(0.37)   | -0.12<br>(0.76) | 0.079<br>(0.84) | 0.27<br>(0.45)  | 0.36<br>(0.31)  |                 |                 |         |         |
| trees       | 0.0061<br>(1.0) | 0.19<br>(0.61)   | -0.10<br>(0.79) | 0.055<br>(0.89) | 0.018<br>(0.97) | 0.12<br>(0.76)  | 0.70<br>(0.031) |                 |         |         |
| inverts     | -0.12<br>(0.79) | 0.095<br>(0.84)  | -0.57<br>(0.15) | -0.31<br>(0.46) | -0.52<br>(0.20) | 0.048<br>(0.93) | 0.12<br>(0.79)  | -0.19<br>(0.66) |         |         |
| birds       | -0.33<br>(0.35) | -0.60<br>(0.073) | 0.091<br>(0.81) | -0.30<br>(0.41) | 0.042<br>(0.92) | -0.16<br>(0.66) | -0.19<br>(0.61) | -0.18<br>(0.63) |         | 0 (1.0) |

**Table SA14** Ranking sampling plots by removing plots sequentially to maximize the resulting effective  $\beta$  diversity among the remaining plots from Figure SA16. 1 is the most important and is removed last, 10 is the least important and is removed at the beginning.

| Plot name | 16S | 18S | trnL | ITS | COI | COI-spun | seedlings | trees | inverts | birds |
|-----------|-----|-----|------|-----|-----|----------|-----------|-------|---------|-------|
| Plot1     | 2   | 2   | 3    | 2   | 4   | 2        | 2         | 2     | 2       | 3     |
| Plot2     | 7   | 9   | 10   | 8   | 8   | 6        | 8         | 7     | 7       | 8     |
| Plot3     | 4   | 4   | 5    | 3   | 5   | 8        | 5         | 5     | 3       | 2     |
| Plot4     | 3   | 5   | 2    | 6   | 2   | 7        | 6         | 6     | 5       | 5     |
| Plot5     | 10  | 10  | 8    | 10  | 10  | 10       | 10        | 10    | 8       | 1     |
| Plot6     | 9   | 7   | 6    | 5   | 7   | 4        | 4         | 3     | 6       | 7     |
| Plot7     | 6   | 1   | 1    | 7   | 1   | 3        | 7         | 9     | NA*     | 4     |
| Plot8     | 8   | 6   | 9    | 4   | 9   | 5        | 9         | 8     | NA*     | 6     |
| Plot9     | 5   | 8   | 4    | 9   | 3   | 9        | 3         | 1     | 1       | 10    |
| Plot10    | 1   | 3   | 7    | 1   | 6   | 1        | 1         | 4     | 4       | 9     |

\* NA: invertebrate data is missing for Plots 7 and 8.

**Table SA15** Means and standard deviations of Table SA14 between eDNA datasets for ranking plots to maximize effective  $\beta$  diversity among the remaining plots.

|        | eDNA        | Traditional | Traditional No Birds | All         | All No Birds |
|--------|-------------|-------------|----------------------|-------------|--------------|
| Plot1  | 2.5 ± 0.837 | 2.2 ± 0.500 | 2.0 ± 0              | 2.4 ± 0.699 | 2.3 ± 0.707  |
| Plot2  | 8.0 ± 1.41  | 7.5 ± 0.577 | 7.3 ± 0.577          | 7.8 ± 1.14  | 7.8 ± 1.20   |
| Plot3  | 4.8 ± 1.72  | 3.8 ± 1.50  | 4.3 ± 1.15           | 4.4 ± 1.65  | 4.7 ± 1.50   |
| Plot4  | 4.2 ± 2.14  | 5.5 ± 0.577 | 5.7 ± 0.577          | 4.7 ± 1.77  | 4.7 ± 1.87   |
| Plot5  | 9.7 ± 0.816 | 7.2 ± 4.27  | 9.3 ± 1.15           | 8.7 ± 2.83  | 9.6 ± 0.882  |
| Plot6  | 6.3 ± 1.75  | 5.0 ± 1.83  | 4.3 ± 1.53           | 5.8 ± 1.81  | 5.7 ± 1.87   |
| Plot7  | 3.2 ± 2.71  | 6.7 ± 2.52  | 8.0 ± 1.41           | 4.3 ± 3.04  | 4.4 ± 3.25   |
| Plot8  | 6.8 ± 2.14  | 7.7 ± 1.53  | 8.5 ± 0.707          | 7.1 ± 1.90  | 7.2 ± 1.98   |
| Plot9  | 6.3 ± 2.66  | 3.8 ± 4.27  | 1.7 ± 1.15           | 5.3 ± 3.43  | 4.8 ± 3.19   |
| Plot10 | 3.2 ± 2.71  | 4.5 ± 3.32  | 3.0 ± 1.73           | 3.7 ± 2.87  | 3.1 ± 2.32   |

**Table SA16** Spearman correlations and their significance in parentheses of Table SA14 between eDNA datasets for ranking plots to maximize effective  $\beta$  diversity among the remaining plots.

|           | 16S             | 18S             | trnL              | ITS              | COI              | COI-spun        | seedlings        | trees           | inverts | birds           |
|-----------|-----------------|-----------------|-------------------|------------------|------------------|-----------------|------------------|-----------------|---------|-----------------|
| 18S       | 0.67<br>(0.039) |                 |                   |                  |                  |                 |                  |                 |         |                 |
| trnL      | 0.47<br>(0.18)  | 0.65<br>(0.049) |                   |                  |                  |                 |                  |                 |         |                 |
| ITS       | 0.64<br>(0.054) | 0.68<br>(0.035) | 0.079<br>(0.84)   |                  |                  |                 |                  |                 |         |                 |
| COI       | 0.60<br>(0.073) | 0.65<br>(0.049) | 0.93<br>(0.00013) | 0.091<br>(0.81)  |                  |                 |                  |                 |         |                 |
| COI-spun  | 0.44<br>(0.20)  | 0.71<br>(0.028) | 0.15<br>(0.68)    | 0.71<br>(0.028)  | 0.20<br>(0.58)   |                 |                  |                 |         |                 |
| seedlings | 0.75<br>(0.018) | 0.48<br>(0.17)  | 0.38<br>(0.28)    | 0.60<br>(0.073)  | 0.45<br>(0.19)   | 0.50<br>(0.14)  |                  |                 |         |                 |
| trees     | 0.52<br>(0.13)  | 0.15<br>(0.68)  | 0.26<br>(0.47)    | 0.38<br>(0.28)   | 0.33<br>(0.35)   | 0.21<br>(0.56)  | 0.88<br>(0.0020) |                 |         |                 |
| inverts   | 0.62<br>(0.11)  | 0.62<br>(0.11)  | 0.67<br>(0.083)   | 0.40<br>(0.33)   | 0.76<br>(0.037)  | 0.14<br>(0.75)  | 0.74<br>(0.046)  | 0.83<br>(0.015) |         |                 |
| birds     | -0.16<br>(0.66) | 0.18<br>(0.63)  | 0.21<br>(0.56)    | -0.0061<br>(1.0) | -0.067<br>(0.86) | -0.22<br>(0.54) | -0.41<br>(0.25)  | -0.48<br>(0.17) |         | -0.33<br>(0.43) |

**Table SA17** Distance-based redundancy analysis and their ANOVA tests in each step for the eDNA biodiversity datasets (16S, 18S, *trnL*).

|                    | All     |            |        | VIF < 10 | Forward | Backward |
|--------------------|---------|------------|--------|----------|---------|----------|
|                    | Inertia | Proportion | Pr(>F) | Pr(>F)   | Pr(>F)  | Pr(>F)   |
| <b>16S</b>         |         |            |        |          |         |          |
| Elevation          | 0.48    | 9.6%       | 0.04   |          |         |          |
| Slope              | 0.43    | 8.7%       | 0.06   | 0.008    |         |          |
| Aspect             | 0.37    | 7.4%       | 0.13   |          |         |          |
| Mean.Temp          | 0.42    | 8.5%       | 0.04   | 0.032    | 0.001   | 0.012    |
| cos.aspect         | 0.45    | 9.1%       | 0.05   | 0.049    |         |          |
| sin.aspect         | 0.43    | 8.7%       | 0.06   | 0.003    |         |          |
| Water.Content      | 0.50    | 10.1%      | 0.01   |          |         |          |
| pH                 | 0.93    | 18.8%      | 0.01   | 0.007    | 0.002   | 0.001    |
| EC                 | 0.61    | 12.2%      | 0.01   |          |         |          |
| Organic.C          | 0.56    | 11.4%      | 0.01   |          |         |          |
| Total.N            | 0.52    | 10.5%      | 0.01   |          |         |          |
| C.N.ratio          | 0.44    | 8.9%       | 0.05   | 0.126    |         |          |
| NO3.N              | 0.28    | 5.7%       | 0.28   | 0.433    |         |          |
| NH4.N              | 0.50    | 10.0%      | 0.03   | 0.132    |         |          |
| Olsen.P            | 0.67    | 13.5%      | 0.01   | 0.583    | 0.055   | 0.001    |
| <b>18S</b>         |         |            |        |          |         |          |
| Elevation          | 0.64    | 9.11%      | 0.01   |          |         |          |
| Slope              | 0.62    | 8.84%      | 0.03   | 0.008    | 0.011   | 0.006    |
| Aspect             | 0.45    | 6.45%      | 0.17   |          |         |          |
| Mean.Temp          | 0.56    | 7.99%      | 0.03   | 0.067    |         | 0.073    |
| cos.aspect         | 0.37    | 5.23%      | 0.43   | 0.286    |         |          |
| sin.aspect         | 0.36    | 5.14%      | 0.43   | 0.204    |         | 0.231    |
| Water.Content      | 0.63    | 8.95%      | 0.01   |          |         |          |
| pH                 | 0.60    | 8.51%      | 0.03   | 0.022    |         | 0.031    |
| EC                 | 0.46    | 6.48%      | 0.10   |          |         |          |
| Organic.C          | 0.55    | 7.80%      | 0.06   |          |         |          |
| Total.N            | 0.55    | 7.81%      | 0.04   |          |         |          |
| C.N.ratio          | 0.42    | 5.91%      | 0.20   | 0.034    |         |          |
| NO3.N              | 0.38    | 5.42%      | 0.40   | 0.763    |         | 0.352    |
| NH4.N              | 0.46    | 6.56%      | 0.13   | 0.019    |         |          |
| Olsen.P            | 0.47    | 6.63%      | 0.12   | 0.359    | 0.056   | 0.002    |
| <b><i>trnL</i></b> |         |            |        |          |         |          |
| Elevation          | 0.62    | 7.09%      | 0.01   |          |         |          |
| Slope              | 0.61    | 7.01%      | 0.01   | 0.001    |         | 0.001    |
| Aspect             | 0.55    | 6.31%      | 0.04   |          |         |          |
| Mean.Temp          | 0.58    | 6.70%      | 0.01   | 0.01     |         | 0.01     |
| cos.aspect         | 0.66    | 7.53%      | 0.01   | 0.001    |         | 0.001    |
| sin.aspect         | 0.52    | 6.00%      | 0.07   | 0.01     |         |          |
| Water.Content      | 0.65    | 7.53%      | 0.01   |          |         |          |
| pH                 | 0.70    | 8.06%      | 0.01   | 0.057    | 0.001   | 0.002    |
| EC                 | 0.60    | 6.88%      | 0.01   |          |         |          |
| Organic.C          | 0.65    | 7.42%      | 0.01   |          |         |          |
| Total.N            | 0.63    | 7.30%      | 0.01   |          |         |          |
| C.N.ratio          | 0.50    | 5.76%      | 0.14   | 0.554    |         |          |
| NO3.N              | 0.55    | 6.32%      | 0.03   | 0.104    |         |          |
| NH4.N              | 0.58    | 6.68%      | 0.01   | 0.511    |         |          |
| Olsen.P            | 0.63    | 7.22%      | 0.01   | 0.175    | 0.001   | 0.02     |



**Table SA18** Distance-based redundancy analysis and their ANOVA tests in each step for the eDNA biodiversity datasets (ITS, COI-soil and COI-soil spun).

| ITS           | All     |            |        | VIF<<br>10 | Forward | Backward |
|---------------|---------|------------|--------|------------|---------|----------|
|               | Inertia | Proportion | Pr(>F) | Pr(>F)     | Pr(>F)  | Pr(>F)   |
| Elevation     | 0.60    | 6.67%      | 0.01   |            |         |          |
| Slope         | 0.65    | 7.19%      | 0.01   | 0.001      | 0.002   | 0.002    |
| Aspect        | 0.65    | 7.15%      | 0.01   |            |         |          |
| Mean.Temp     | 0.59    | 6.54%      | 0.01   | 0.054      |         |          |
| cos.aspect    | 0.57    | 6.36%      | 0.04   | 0.109      |         |          |
| sin.aspect    | 0.58    | 6.46%      | 0.01   | 0.039      |         | 0.007    |
| Water.Content | 0.70    | 7.72%      | 0.01   |            |         |          |
| pH            | 0.48    | 5.35%      | 0.46   | 0.133      |         |          |
| EC            | 0.67    | 7.42%      | 0.01   |            |         |          |
| Organic.C     | 0.71    | 7.88%      | 0.01   |            |         |          |
| Total.N       | 0.72    | 7.95%      | 0.01   |            |         |          |
| C.N.ratio     | 0.51    | 5.68%      | 0.16   | 0.158      |         |          |
| NO3.N         | 0.58    | 6.45%      | 0.02   | 0.226      |         | 0.122    |
| NH4.N         | 0.68    | 7.50%      | 0.01   | 0.16       |         |          |
| Olsen.P       | 0.64    | 7.13%      | 0.01   | 0.039      | 0.004   | 0.022    |
| COI           | Inertia | Proportion | Pr(>F) | Pr(>F)     | Pr(>F)  | Pr(>F)   |
| Elevation     | 0.60    | 6.66%      | 0.01   |            |         |          |
| Slope         | 0.58    | 6.37%      | 0.01   | 0.001      |         |          |
| Aspect        | 0.55    | 6.08%      | 0.01   |            |         |          |
| Mean.Temp     | 0.59    | 6.49%      | 0.01   | 0.004      |         | 0.001    |
| cos.aspect    | 0.59    | 6.56%      | 0.01   | 0.004      |         |          |
| sin.aspect    | 0.52    | 5.75%      | 0.10   | 0.008      |         |          |
| Water.Content | 0.64    | 7.08%      | 0.01   |            |         |          |
| pH            | 0.64    | 7.03%      | 0.01   | 0.043      | 0.001   | 0.003    |
| EC            | 0.61    | 6.79%      | 0.01   |            |         |          |
| Organic.C     | 0.64    | 7.06%      | 0.01   |            |         |          |
| Total.N       | 0.63    | 6.98%      | 0.01   |            |         |          |
| C.N.ratio     | 0.53    | 5.84%      | 0.04   | 0.213      |         |          |
| NO3.N         | 0.57    | 6.29%      | 0.01   | 0.171      |         | 0.004    |
| NH4.N         | 0.60    | 6.63%      | 0.01   | 0.263      |         | 0.006    |
| Olsen.P       | 0.62    | 6.91%      | 0.01   | 0.194      | 0.001   | 0.048    |
| COI-spun      | Inertia | Proportion | Pr(>F) | Pr(>F)     | Pr(>F)  | Pr(>F)   |
| Elevation     | 0.61    | 6.54%      | 0.01   |            |         |          |
| Slope         | 0.57    | 6.06%      | 0.04   | 0.004      |         | 0.003    |
| Aspect        | 0.61    | 6.52%      | 0.01   |            |         |          |
| Mean.Temp     | 0.57    | 6.08%      | 0.02   | 0.035      |         | 0.022    |
| cos.aspect    | 0.60    | 6.48%      | 0.01   | 0.012      | 0.001   | 0.014    |
| sin.aspect    | 0.59    | 6.29%      | 0.01   | 0.005      | 0.011   | 0.007    |
| Water.Content | 0.60    | 6.40%      | 0.01   |            |         |          |
| pH            | 0.54    | 5.82%      | 0.07   | 0.058      |         |          |
| EC            | 0.51    | 5.43%      | 0.36   |            |         |          |
| Organic.C     | 0.53    | 5.73%      | 0.12   |            |         |          |
| Total.N       | 0.54    | 5.83%      | 0.07   |            |         |          |
| C.N.ratio     | 0.45    | 4.83%      | 0.90   | 0.912      |         |          |
| NO3.N         | 0.55    | 5.90%      | 0.02   | 0.046      |         | 0.014    |
| NH4.N         | 0.53    | 5.68%      | 0.12   | 0.061      |         | 0.014    |
| Olsen.P       | 0.51    | 5.49%      | 0.26   | 0.229      | 0.008   |          |

**Table SA19** The constrained and unconstrained inertia changes during distance-based redundancy analysis for the eDNA biodiversity datasets (16S, 18S, *trnL*, ITS, COI-soil and COI-soil spun).

|               | All     |          | VIF < 10 |          | Forward |          | Backward |            |
|---------------|---------|----------|----------|----------|---------|----------|----------|------------|
|               | Inertia | Proport. | Inertia  | Proport. | Inertia | Proport. | Inertia  | Proportion |
| 16S           |         |          |          |          |         |          |          |            |
| Constrained   | 4.22    | 85%      | 3.04     | 61.3%    | 1.86    | 37.4%    | 1.86     | 37.4%      |
| Unconstrained | 0.74    | 15%      | 1.92     | 38.7%    | 3.11    | 62.6%    | 3.11     | 62.6%      |
| 18S           |         |          |          |          |         |          |          |            |
| Constrained   | 5.86    | 83.4%    | 3.84     | 54.6%    | 1.11    | 15.8%    | 2.87     | 40.8%      |
| Unconstrained | 1.17    | 16.6%    | 3.19     | 45.4%    | 5.92    | 84.2%    | 4.16     | 59.2%      |
| <i>trnL</i>   |         |          |          |          |         |          |          |            |
| Constrained   | 7.07    | 81.3%    | 4.49     | 51.61%   | 1.33    | 15.3%    | 2.82     | 32.4%      |
| Unconstrained | 1.63    | 18.7%    | 4.21     | 48.39%   | 7.37    | 84.7%    | 5.88     | 67.6%      |
| ITS           |         |          |          |          |         |          |          |            |
| Constrained   | 7.31    | 81%      | 4.62     | 51.24%   | 1.26    | 14%      | 2.28     | 25.3%      |
| Unconstrained | 1.72    | 19%      | 4.40     | 48.76%   | 7.76    | 86%      | 6.74     | 74.7%      |
| COI           |         |          |          |          |         |          |          |            |
| Constrained   | 7.33    | 81%      | 4.56     | 50.49%   | 1.26    | 14%      | 2.74     | 30.3%      |
| Unconstrained | 1.71    | 19%      | 4.47     | 49.51%   | 7.78    | 86%      | 6.29     | 69.7%      |
| COI-spun      |         |          |          |          |         |          |          |            |
| Constrained   | 7.50    | 80.4%    | 4.71     | 50.49%   | 1.77    | 19%      | 3.34     | 35.8%      |
| Unconstrained | 1.83    | 19.6%    | 4.62     | 49.52%   | 7.56    | 81%      | 5.99     | 64.2%      |

**Table SA20** Distance-based redundancy analysis and their ANOVA tests in each step for the plant datasets (seedlings and trees).

|            | All     |            | VIF < 10 |        | Forward | Backward |
|------------|---------|------------|----------|--------|---------|----------|
|            | Inertia | Proportion | Pr(>F)   | Pr(>F) | Pr(>F)  | Pr(>F)   |
| seedlings  |         |            |          |        |         |          |
| Slope      | 0.48    | 14.18%     | 0.05     | 0.094  |         |          |
| Mean.Temp  | 0.54    | 15.96%     | 0.01     | 0.113  |         | 0.001    |
| cos.aspect | 0.43    | 12.69%     | 0.20     | 0.424  |         |          |
| sin.aspect | 0.41    | 11.96%     | 0.28     | 0.448  |         |          |
| pH         | 0.58    | 17.09%     | 0.01     | 0.152  | 0.001   | 0.014    |
| C.N.ratio  | 0.45    | 13.27%     | 0.10     | 0.816  |         |          |
| NO3.N      | 0.55    | 16.05%     | 0.01     | 0.456  | 0.005   | 0.002    |
| NH4.N      | 0.44    | 12.94%     | 0.10     |        |         |          |
| Olsen.P    | 0.47    | 13.87%     | 0.06     | 0.772  |         |          |
| trees      |         |            |          |        |         |          |
| Slope      | 0.52    | 17.5%      | 0.09     | 0.023  |         | 0.015    |
| Mean.Temp  | 0.69    | 23.4%      | 0.01     | 0.03   | 0.002   |          |
| cos.aspect | 0.48    | 16.4%      | 0.07     | 0.099  | 0.095   |          |
| sin.aspect | 0.44    | 15.0%      | 0.13     | 0.126  |         |          |
| pH         | 0.63    | 21.4%      | 0.02     | 0.177  |         | 0.068    |
| C.N.ratio  | 0.35    | 11.7%      | 0.33     | 0.253  |         | 0.014    |
| NO3.N      | 0.50    | 16.8%      | 0.07     | 0.2    |         | 0.071    |
| NH4.N      | 0.41    | 13.8%      | 0.15     |        |         |          |

**Table SA21** The constrained and unconstrained inertia changes during distance-based redundancy analysis for the plant datasets (seedlings and trees).

|               | All     |          | VIF < 10 |          | Forward |          | Backward |            |
|---------------|---------|----------|----------|----------|---------|----------|----------|------------|
|               | Inertia | Proport. | Inertia  | Proport. | Inertia | Proport. | Inertia  | Proportion |
| seedlings     |         |          |          |          |         |          |          |            |
| Constrained   | 3.40    | 100%     | 3.05     | 89.9%    | 1.10    | 32.5%    | 1.51     | 44.6%      |
| Unconstrained | 0.00    | 0%       | 0.34     | 10.1%    | 2.29    | 67.5%    | 1.88     | 55.4%      |
| seedlings     |         |          |          |          |         |          |          |            |
| Constrained   | 2.95    | 100%     | 2.75     | 93.2%    | 1.11    | 37.6%    | 1.80     | 60.9%      |
| Unconstrained | 0.00    | 0%       | 0.20     | 6.8%     | 1.84    | 62.4%    | 1.15     | 39.1%      |
